# Supplementary material for: Associations between exemption and survival outcomes in the UK's primary care pay-for-performance programme: a retrospective cohort study
Source: PubMed Central journal article supplement — BMJ Qual Saf. 2015 Dec 1;25(9):657–70. doi: 10.1136/bmjqs-2015-004602 (PMC5013124; doi:10.1136/bmjqs-2015-004602), 2015-12-01
Supplement: bmjqs-2015-004602-s1.pdf [file bmjqs-2015-004602-s1.pdf]

## **Online appendix for “Investigating the characteristics and outcomes of patients excluded from the UK’s primary care pay-for-performance programme: a retrospective cohort study”**

### **Methods**

#### **Recording of exception reporting**

Family practices record diagnoses, referrals, processes of care (including QOF-related activities) and exception reporting of patients on their clinical computing systems using a hierarchical coding set (‘Read’ codes). Practice level data are collated in the national Quality and Management Analysis System (QMAS) and practice performance against QOF targets is assessed annually. For each clinical indicator, achievement is calculated as the number of patients for whom the target was met divided by the number of eligible patients. For example, for indicator DM11, eligible patients are those with a diagnosis of diabetes (the denominator) and the target is met if they have a recording of blood pressure within 15 months of the end of the financial year (the numerator). Patients who are exception reported are excluded from the denominator. However, if a patient who has been exception reported also meets the target in the assessment period, the exception report is overridden and they are included in both the numerator and denominator.

#### **Data source**

National exception reporting data are only available at the practice level through QMAS, and the individual characteristics of exception reported patients cannot be directly assessed. We therefore extracted data from the Clinical Practice Research Datalink (CPRD), a database of individual patient records drawn from family practices using the Vision clinical computer system (installed in approximately a fifth of practices<sup>1</sup>). In July 2012, data were available for 645 practices and 13,772,992 patients. Anonymised electronic patient data were linked to Office of National Statistics (ONS) mortality data and to area deprivation quintile, as measured by the 2010 Index of Multiple Deprivation (IMD) in England.<sup>2</sup> However, patient deprivation quintile<sup>3</sup> and verified deaths were only available for a subgroup of English practices that have agreed to the linkages.

## Study design: retrospective cohort

The Quality and Outcomes Framework was introduced on 1 April 2004 and is reviewed annually. In a major revision in 2006: new clinical domains were introduced (for example, dementia, depression, learning disability, palliative care), several indicators were re-structured (for example, condition specific smoking indicators were amalgamated into a single smoking domain) and payment thresholds were changed.<sup>4</sup> To ensure consistency in our longitudinal analyses we limited the study period to years 3 to 8 of the scheme (1 April 2006 to 31 March 2012), after the major revision. Practice performance on the QOF is measured across financial years and we therefore divided the study period into six financial years (1 April to 31 March the following year). Within each year we identified practices that reliably contributed data for the whole year, the characteristics of which have been described elsewhere.<sup>5</sup> Within each practice and study year, we selected patients registered with the practice for the full year and from these we identified patients with at least one condition of interest, at any point in time up to the end of the respective year.

Conditions of interest were those incentivised in the QOF from 2006 onwards: atrial fibrillation, asthma, hypertension, cancer, coronary heart disease, heart failure, chronic kidney disease, chronic obstructive pulmonary disease, dementia, depression, diabetes, epilepsy, learning disability, severe mental health, stroke and hypothyroidism. We excluded clinical domains that were not a condition (e.g. palliative care), were concerned only with maintenance of a register (e.g. obesity), or that were introduced in later years (e.g. osteoporosis). We used an inclusive approach in our case finding, to better account for changes in code usage over time. In addition to the QOF business rule code sets (the algorithms used for the identification of patients in the incentive scheme) we also used clinician-identified relevant keywords to generate unrefined, inclusive lists of Read and other clinical activity codes. Two clinicians independently reviewed these lists and reached consensus on a conservative list of codes (indicating the presence of the respective condition with a high degree of certainty). All codes used in the study are available from [www.clinicalcodes.org](http://www.clinicalcodes.org).<sup>6</sup> All conditions, with the exception of asthma, depression and epilepsy, were treated as chronic and unresolvable. Patients with one of the three resolvable conditions were considered condition-free if a code denoting resolution was observed, from that time onwards.

## Datasets

Using R version 3.1.1,<sup>7</sup> we generated three datasets with which we aimed to answer our main research questions. Dataset #1 included yearly aggregated exception reporting information for patients with at least one of the conditions of interest (one record per patient, in each year). Exceptions were categorised as: i) clinical contraindication or unsuitability; ii) informed dissent; iii) unknown (where the precise reason for exclusion is not available). We did not examine logistical exceptions, as these mainly relate to patients registered or diagnosed towards the end of each year and we did not expect exclusion on the basis of registration date to be associated with mortality, given that the exception only applies in the index year. Patient data included age, sex, smoking status, Body Mass Index (BMI), patient location deprivation quintile, first diagnosis date for each study condition (if applicable), practice list size, region and practice deprivation quintile. We used the *mibmi* algorithm in Stata to interpolate BMI values over time, allowing us to make use of a more complete dataset.<sup>8</sup> Dataset #2 contained all recorded exception information for patients in dataset #1 (i.e. patients with at least one of the conditions of interest): Read exception code, type of exception, exception date and QOF indicators to which the exception applied. Dataset #3 focused on patients with diabetes aged 18 or over (one record per patient, in each year): diabetes diagnosis date, information on eligibility, achievement and exception for 15 clinical indicators that were included in the QOF diabetes domain for most (if not all) of the study period. Included indicators were modelled using diagnostic codes, but we also used codes relating to medications, tests undertaken and test results where appropriate.<sup>9</sup> In addition, some indicators have undergone small or moderate changes over time and we aimed to model these within each year. Details for the indicators are provided in appendix table A3.

## Analyses

All analyses were undertaken in Stata v13.1 and an alpha level of 1% was used throughout.<sup>10</sup> However, statistical significance is not very informative in analyses of datasets of this size (even very small absolute differences will usually be statistically significant) and we focus on the clinical significance of the effect sizes rather than p-values.

Using dataset #1 we descriptively examined the characteristics of patients who are exception reported and through regression modelling, focusing only on practices with linked ONS data,

we investigated predictors of exception reporting and examined whether exception reporting is associated with mortality. Longitudinal random-effects logistic regression models with the *xtlogit* command and the patient identifier as the panel variable were used to assess the effect of year, gender, age, number of relevant conditions (one, two, three, four or more), practice list size, region and deprivation on presence of at least one relevant exception code. Alternative models included each of the 16 conditions of interest as predictors, rather than an overall measure of multimorbidity.

Proportional-hazards survival models with the *stcox* command and yearly time-windows were used to examine the associations of age, gender, smoking status (current, ex, never smoked, missing), patient deprivation, each of the 16 conditions of interest, practice list size, practice deprivation quintile and exceptions on CPRD and ONS mortality. Since recorded clinical information, including exceptions, was more likely to be missing in the year of a patient's death (less time for events to be recorded in), and to avoid introducing a form of 'reverse' censorship bias, we introduced a 1-year lag into the analysis model. Therefore, recorded information in each year was used to model survival or death in the subsequent year; i.e. 2006/7 predictor data were linked to 2007/8 deaths, et cetera, up until 2010/11 predictors linked to 2011/12 deaths. We introduced time-varying covariates for age, smoking status, cancer, coronary heart disease, dementia, diabetes and learning disability, modelling a logarithmic increase in risk, to ensure the proportional-hazard assumption stood (tested using Schoenfeld residuals and command *estat phtest*). The relationship between being exception reported and mortality was investigated in two separate survival models: in the first, types of exception reporting (clinical contraindication, informed dissent and reason unknown) were coded and analysed separately, and in the second by type all reasons were aggregated into a single predictor. As sensitivity analyses, we calculated propensity scores (for all reasons, contraindication and informed dissent) which we used to better control for the role of the covariates (all we included in the main model) on the probability of being exception reported.

We used dataset #2 to investigate the frequency of all relevant exception codes used over time and to visualise the seasonality of exception reporting. We aggregated the data at the practice level to calculate the number of exception codes per 1000 patients in each practice. We then used a random-effects negative binomial regression model with the *xtnbreg* command (practice identifier used as panel variable) to quantify the monthly seasonality of

these overall exception rates, controlling for practice list size, year and deprivation quintile. Negative binomial regression was selected over Poisson, since initial findings indicated considerable over-dispersion of the count data.

Dataset #3 was used to descriptively provide insight on exception reported patients for which the relevant quality indicator (or indicators) was met, for all indicators in the diabetes domain and each financial year. Since only exceptions for which the relevant indicators are not met are reported under the QMAS, we calculated the 'met' and 'unmet' levels of exception reporting for the diabetes domain, over time. These rates can provide some insight on the use of the exception reporting provision, for each indicator. For each indicator, the reasons for exception reporting patients did not differ substantially between met and unmet exemptions (figure A1). For example, for tight glycaemic control (HbA1c  $\leq$ 7.0/7.5%), contraindications comprised 58% of met exemptions and 59% of unmet exemptions. For moderate glycaemic control (HbA1c  $\leq$ 9.0/10.0%) the respective proportions were 51% and 53%.

## References

1. Kontopantelis E, Buchan I, Reeves D, Checkland K, Doran T. Relationship between quality of care and choice of clinical computing system: retrospective analysis of family practice performance under the UK's quality and outcomes framework. *BMJ open* 2013;3.
2. Communities and Local Government. The English Indices of Deprivation 2010: Technical Report. Government DfCaL, 2011. <http://www.communities.gov.uk/documents/statistics/pdf/1870718.pdf>
3. McLean G, Guthrie B, Watt G, Gabbay M, O'Donnell CA. Practice postcode versus patient population: a comparison of data sources in England and Scotland. *International journal of health geographics* 2008;7:37.
4. Newman SC, Bland RC. Mortality in a Cohort of Patients with Schizophrenia - a Record Linkage Study. *Can J Psychiat* 1991;36:239-45.
5. Kontopantelis E, Springate D, Reeves D, Ashcroft DM, Valderas JM, Doran T. Withdrawing performance indicators: retrospective analysis of general practice performance under UK Quality and Outcomes Framework. *Bmj* 2014;348:g330.
6. Springate DA, Kontopantelis E, Ashcroft DM, Olier I, Parisi R, Chamapiwa E, et al. ClinicalCodes: an online clinical codes repository to improve the validity and reproducibility of research using electronic medical records. *PLoS one* 2014;9:e99825.
7. R: A Language and Environment for Statistical Computing [program]. 3.1.1 version: R Foundation for Statistical Computing,, 2013.

8. Kontopantelis E, Parisi R, Reeves D, Springate DA. Longitudinal multiple imputation approaches for Body Mass Index: the mibmi command. *The Stata Journal* 2015.
9. Kontopantelis E, Reeves D, Valderas JM, Campbell S, Doran T. Recorded quality of primary care for patients with diabetes in England before and after the introduction of a financial incentive scheme: a longitudinal observational study. *BMJ quality & safety* 2013;22:53-64.
10. Stata Statistical software for Windows [program]. 13.1 version, 2013.

**Table A1: Characteristics of excepted and non-excepted patients in 2010/11 (percentages within each characteristic, across exception reporting categories)**

|                                                                         | No exception code <sup>†</sup> | Clinical contra-indication* <sup>†</sup> | Informed dissent* <sup>†</sup> | Reason unknown* <sup>†</sup> | Any (excluding logistical)* <sup>‡</sup> |
|-------------------------------------------------------------------------|--------------------------------|------------------------------------------|--------------------------------|------------------------------|------------------------------------------|
| <i>Populations</i>                                                      |                                |                                          |                                |                              |                                          |
| No of patients <sup>§</sup>                                             | 1266797                        | 196762                                   | 145267                         | 1578                         | 315565                                   |
| % of patients <sup>§</sup>                                              | 80.1                           | 12.4                                     | 9.2                            | 0.1                          | 19.9                                     |
| No of ONS linked patients <sup>§</sup>                                  | 767118                         | 113256                                   | 84028                          | 828                          | 182208                                   |
| % of ONS linked patients <sup>§</sup>                                   | 80.8                           | 11.9                                     | 8.9                            | 0.1                          | 19.2                                     |
| <i>Patient characteristics</i>                                          |                                |                                          |                                |                              |                                          |
| %Male                                                                   | 78.5                           | 13                                       | 10.2                           | 0.1                          | 21.5                                     |
| %Female                                                                 | 81.3                           | 12                                       | 8.4                            | 0.1                          | 18.7                                     |
| Mean age (sd)                                                           | 54.0(19.2)                     | 64.5(18.8)                               | 59.5(19.7)                     | 60.3(21.9)                   | 61.9(19.5)                               |
| Mean BMI (sd)                                                           | 28.9(6.6)                      | 28.8(6.5)                                | 29.2(6.9)                      | 29.2(6.6)                    | 28.9(6.6)                                |
| Mean no of conditions (sd) <sup>#</sup>                                 | 1.6(0.9)                       | 2.6(1.5)                                 | 2.1(1.3)                       | 2.4(1.4)                     | 2.3(1.4)                                 |
| % dead in 2011/12                                                       | 58.6                           | 32.5                                     | 14.6                           | 0.4                          | 41.4                                     |
| <i>Smoking status (% of cases across exception categories)</i>          |                                |                                          |                                |                              |                                          |
| Never                                                                   | 82.2                           | 10.4                                     | 8.7                            | 0.1                          | 17.8                                     |
| Ex-smoker                                                               | 78.1                           | 14.6                                     | 9.3                            | 0.1                          | 21.9                                     |
| Current smoker                                                          | 81.3                           | 10.4                                     | 10.0                           | 0.1                          | 18.7                                     |
| Missing                                                                 | 89.8                           | 4.6                                      | 5.8                            | 0.1                          | 10.2                                     |
| <i>Condition (% of cases across exception categories)</i>               |                                |                                          |                                |                              |                                          |
| Atrial fibrillation                                                     | 58.6                           | 34.0                                     | 12.1                           | 0.2                          | 41.4                                     |
| Asthma                                                                  | 73.3                           | 14.2                                     | 14.6                           | 0.1                          | 26.7                                     |
| Hypertension                                                            | 75.0                           | 16.5                                     | 11.0                           | 0.1                          | 25.0                                     |
| Cancer                                                                  | 79.6                           | 14.0                                     | 8.4                            | 0.1                          | 20.4                                     |
| Coronary heart disease                                                  | 54.3                           | 36.2                                     | 15.7                           | 0.2                          | 45.7                                     |
| Heart failure                                                           | 51.6                           | 40.3                                     | 14.9                           | 0.2                          | 48.4                                     |
| Chronic kidney disease                                                  | 65.6                           | 26.1                                     | 12.3                           | 0.2                          | 34.4                                     |
| Chronic obstructive pulmonary disease                                   | 54.2                           | 33.9                                     | 18.5                           | 0.2                          | 45.8                                     |
| Dementia                                                                | 61.7                           | 31.2                                     | 11.5                           | 0.3                          | 38.3                                     |
| Depression                                                              | 84.0                           | 11.1                                     | 6.2                            | 0.1                          | 16.0                                     |
| Diabetes mellitus                                                       | 61.4                           | 24.5                                     | 18.9                           | 0.2                          | 38.6                                     |
| Epilepsy                                                                | 71.5                           | 21.4                                     | 9.4                            | 0.3                          | 28.5                                     |
| Learning disability                                                     | 84.2                           | 11.3                                     | 5.4                            | 0.1                          | 15.8                                     |
| Severe mental illness                                                   | 72.8                           | 17.1                                     | 12.5                           | 0.3                          | 27.2                                     |
| Stroke                                                                  | 59.4                           | 28.9                                     | 17.1                           | 0.2                          | 40.6                                     |
| Hypothyroidism                                                          | 80.3                           | 13.3                                     | 8.3                            | 0.1                          | 19.7                                     |
| <i>Patient IMD (% of cases across exception categories)<sup>¶</sup></i> |                                |                                          |                                |                              |                                          |
| 1 (least deprived)                                                      | 82.2                           | 10.7                                     | 8.6                            | 0.0                          | 17.8                                     |
| 2                                                                       | 80.9                           | 12.3                                     | 8.3                            | 0.1                          | 19.1                                     |
| 3                                                                       | 80.1                           | 12.4                                     | 9.1                            | 0.1                          | 19.9                                     |

|                                                              | No exception code <sup>†</sup> | Clinical contra-indication* <sup>†</sup> | Informed dissent* <sup>†</sup> | Reason unknown* <sup>†</sup> | Any (excluding logistical)* <sup>‡</sup> |
|--------------------------------------------------------------|--------------------------------|------------------------------------------|--------------------------------|------------------------------|------------------------------------------|
| 4                                                            | 80.4                           | 12.0                                     | 9.3                            | 0.1                          | 19.6                                     |
| 5                                                            | 79.9                           | 12.7                                     | 9.1                            | 0.1                          | 20.1                                     |
| <i>Practice IMD (% of cases across exception categories)</i> |                                |                                          |                                |                              |                                          |
| 1 (least deprived)                                           | 81.7                           | 11.4                                     | 8.4                            | 0.2                          | 18.3                                     |
| 2                                                            | 80.4                           | 12.3                                     | 8.9                            | 0.1                          | 19.6                                     |
| 3                                                            | 79.6                           | 13.1                                     | 8.9                            | 0.1                          | 20.4                                     |
| 4                                                            | 79.9                           | 12.1                                     | 9.7                            | 0.1                          | 20.1                                     |
| 5                                                            | 78.6                           | 13.3                                     | 10.0                           | 0.1                          | 21.4                                     |
| <i>Region (% of cases across exception categories)</i>       |                                |                                          |                                |                              |                                          |
| North East                                                   | 81.0                           | 11.1                                     | 9.8                            | 0.1                          | 19.0                                     |
| North West                                                   | 80.0                           | 12.7                                     | 9.1                            | 0.1                          | 20.0                                     |
| Yorkshire & Humber                                           | 81.3                           | 12.1                                     | 8.1                            | 0.0                          | 18.7                                     |
| East Midlands                                                | 79.5                           | 12.7                                     | 9.2                            | 0.7                          | 20.5                                     |
| West Midlands                                                | 81.6                           | 12.0                                     | 7.8                            | 0.0                          | 18.4                                     |
| East England                                                 | 80.7                           | 12.3                                     | 8.5                            | 0.2                          | 19.3                                     |
| South West                                                   | 77.5                           | 15.2                                     | 9.4                            | 0.2                          | 22.5                                     |
| South Central                                                | 82.0                           | 10.8                                     | 8.6                            | 0.1                          | 18.0                                     |
| London                                                       | 82.2                           | 10.5                                     | 8.7                            | 0.1                          | 17.8                                     |
| South East                                                   | 82.4                           | 10.8                                     | 8.2                            | 0.1                          | 17.6                                     |
| England                                                      | 80.9                           | 11.9                                     | 8.7                            | 0.1                          | 19.1                                     |
| Northern Ireland                                             | 82.7                           | 11.9                                     | 6.5                            | 0.0                          | 17.3                                     |
| Scotland                                                     | 75.7                           | 15.0                                     | 11.5                           | 0.1                          | 24.3                                     |
| Wales                                                        | 76.9                           | 13.7                                     | 11.7                           | 0.1                          | 23.1                                     |

\* Patients associated with one or more codes from the respective category.

† Percentages within these categories are row percentages and add up to 100%.

‡ Within this category, reporting percentages of cases with any exception code (at least one) over all cases.

§ Patients with at least one of the 16 conditions included in the analyses: atrial fibrillation, asthma, hypertension, cancer, coronary heart disease, heart failure, chronic kidney disease, chronic obstructive pulmonary disease, dementia, depression, diabetes mellitus, epilepsy, learning disability, severe mental illness, stroke and hypothyroidism.

# Over the 16 conditions of interest.

¶ Available for ONS linked patients only.



**Table A2: Modelled condition prevalence rates for the population, 2006/7 to 2011/12**

|                                                           | 2006/7  | 2007/8  | 2008/9  | 2009/10 | 2010/11 | 2011/12 |
|-----------------------------------------------------------|---------|---------|---------|---------|---------|---------|
| <i>Populations - all practices</i>                        |         |         |         |         |         |         |
| No of practices                                           | 569     | 566     | 565     | 556     | 534     | 499     |
| Total list size                                           | 5321351 | 5370801 | 5449547 | 5432224 | 5301520 | 5069748 |
| % of patients with atrial fibrillation                    | 1.3     | 1.4     | 1.4     | 1.4     | 1.4     | 1.5     |
| No of patients with atrial fibrillation                   | 71233   | 73368   | 75881   | 76661   | 76841   | 74027   |
| % of patients with asthma                                 | 5.7     | 5.5     | 5.5     | 5.5     | 5.2     | 4.9     |
| No of patients with asthma                                | 301101  | 296572  | 301319  | 296629  | 275363  | 246156  |
| % of patients with hypertension                           | 11.3    | 11.4    | 11.5    | 11.5    | 11.4    | 11.2    |
| No of patients with hypertension                          | 602729  | 612786  | 626584  | 622213  | 606603  | 569697  |
| % of patients with cancer                                 | 2.1     | 2.2     | 2.3     | 2.3     | 2.4     | 2.5     |
| No of patients with cancer                                | 114055  | 118399  | 124019  | 127610  | 128828  | 125072  |
| % of patients with coronary heart disease                 | 3.2     | 3.1     | 3       | 2.9     | 2.8     | 2.6     |
| No of patients with coronary heart disease                | 169882  | 165220  | 161679  | 155019  | 146018  | 133264  |
| % of patients with heart failure                          | 0.8     | 0.7     | 0.7     | 0.6     | 0.6     | 0.6     |
| No of patients with heart failure                         | 39917   | 37655   | 36393   | 34833   | 33114   | 30903   |
| % of patients with chronic kidney disease                 | 2.3     | 2.8     | 3       | 3.1     | 3.1     | 3.1     |
| No of patients with chronic kidney disease                | 122367  | 152527  | 165834  | 169533  | 166836  | 156903  |
| % of patients with chronic obstructive pulmonary disease  | 1.1     | 1.2     | 1.2     | 1.2     | 1.2     | 1.2     |
| No of patients with chronic obstructive pulmonary disease | 59510   | 62079   | 64390   | 65114   | 65680   | 63333   |
| % of patients with dementia                               | 0.4     | 0.4     | 0.4     | 0.4     | 0.4     | 0.5     |
| No of patients with dementia                              | 20410   | 20864   | 21744   | 22711   | 23792   | 23144   |
| % of patients with depression                             | 12.2    | 12.3    | 12.4    | 12.5    | 12.5    | 12.5    |
| No of patients with depression                            | 647458  | 661287  | 674995  | 676790  | 664269  | 634759  |
| % of patients with diabetes mellitus                      | 3.2     | 3.4     | 3.5     | 3.6     | 3.7     | 3.8     |
| No of patients with diabetes mellitus                     | 172907  | 179937  | 189010  | 194202  | 195719  | 190502  |
| % of patients with epilepsy                               | 0.6     | 0.6     | 0.6     | 0.6     | 0.6     | 0.6     |
| No of patients with epilepsy                              | 33956   | 33720   | 33956   | 32752   | 31340   | 29433   |
| % of patients with learning disability                    | 0.2     | 0.2     | 0.2     | 0.2     | 0.2     | 0.3     |
| No of patients with learning disability                   | 9666    | 10322   | 12081   | 13088   | 13052   | 12870   |
| % of patients with severe mental illness                  | 0.7     | 0.8     | 0.8     | 0.8     | 0.8     | 0.8     |
| No of patients with severe mental illness                 | 39849   | 41117   | 41957   | 42629   | 42233   | 40946   |
| % of patients with stroke                                 | 1.6     | 1.5     | 1.5     | 1.5     | 1.5     | 1.5     |
| No of patients with stroke                                | 82984   | 82927   | 83622   | 82797   | 81319   | 76590   |

|                                    | 2006/7 | 2007/8 | 2008/9 | 2009/10 | 2010/11 | 2011/12 |
|------------------------------------|--------|--------|--------|---------|---------|---------|
| <i>Populations - all practices</i> |        |        |        |         |         |         |
| % of patients with hypothyroidism  | 2.7    | 2.8    | 2.8    | 2.9     | 2.9     | 2.9     |
| No of patients with hypothyroidism | 144127 | 148944 | 154520 | 155713  | 154856  | 147276  |

**Table A3: Diabetes domain indicators in the Quality and Outcomes Framework and their changes over time**

| Indicator name | CPRD definition                                                          | Type       | QOF year* | QOF name | QOF definition                                                                                                                                                                                                                         | Lt+ | Ut+ | P+ |
|----------------|--------------------------------------------------------------------------|------------|-----------|----------|----------------------------------------------------------------------------------------------------------------------------------------------------------------------------------------------------------------------------------------|-----|-----|----|
| DM2            | % patients with DM, whose notes record BMI in the previous 15 months     | Monitoring | 1-2       | DM2      | The percentage of patients with diabetes whose notes record BMI in the previous 15 months                                                                                                                                              | 25  | 90  | 3  |
|                |                                                                          |            | 3-8       |          |                                                                                                                                                                                                                                        | 40  | 90  | 3  |
| DM5            | % patients with DM who have a record of HbA1c or equivalent in last 15m  | Monitoring | 1-2       | DM5      | The percentage of diabetic patients who have a record of HbA1c or equivalent in the previous 15 months                                                                                                                                 | 25  | 90  | 3  |
|                |                                                                          |            | 3-7       |          |                                                                                                                                                                                                                                        | 40  | 90  | 3  |
| DM6/20/23/26   | % patients with DM in whom last HbA1c<7.5 (or equivalent) in last 15m    | Outcome    | 1-2       | DM6      | The percentage of patients with diabetes in whom the last HbA1C is 7.4 or less (or equivalent test / reference range depending on local laboratory) in last 15 months                                                                  | 25  | 50  | 16 |
|                |                                                                          |            | 3-5       | DM20     | The percentage of patients with diabetes in whom the last HbA1C is 7.5 or less (or equivalent test / reference range depending on local laboratory) in the previous 15 months                                                          | 40  | 50  | 17 |
|                |                                                                          |            | 6-7       | DM23     | The percentage of patients with diabetes in whom the last HbA1c is 7 or less (or equivalent test/reference range depending on local laboratory) in the previous 15 months.                                                             | 40  | 50  | 17 |
|                |                                                                          |            | 8         | DM26     | The percentage of patients with diabetes in whom the last IFCC-HbA1c is 59 mmol/mol (equivalent to HbA1c of 7.5% in DCCT values) or less (or equivalent test/reference range depending on local laboratory) in the previous 15 months. | 40  | 50  | 17 |
| DM7/25/28      | % patients with DM with last HbA1C level is 10 or less in last 15 months | Outcome    | 1-2       | DM7      | The percentage of patients with diabetes in whom the last HbA1C is 10 or less (or equivalent test / reference range depending on local laboratory) in last 15 months                                                                   | 25  | 85  | 11 |
|                |                                                                          |            | 3-5       |          |                                                                                                                                                                                                                                        | 40  | 90  | 11 |
|                |                                                                          |            | 6-7       | DM25     | The percentage of patients with diabetes in whom the last HbA1c is 9 or less (or equivalent test/reference range depending on local laboratory) in the previous 15 months.                                                             | 40  | 90  | 10 |
|                |                                                                          |            | 8         | DM28     | The percentage of patients with diabetes in whom the last IFCC-HbA1c is 75 mmol/mol (equivalent to HbA1c of 9% in DCCT values) or less (or equivalent test/reference range depending on local laboratory) in the previous 15 months.   | 40  | 90  | 10 |

| Indicator name | CPRD definition                                                                                                                                 | Type       | QOF year* | QOF name | QOF definition                                                                                                                                                        | Lt+ | Ut+ | P+ |
|----------------|-------------------------------------------------------------------------------------------------------------------------------------------------|------------|-----------|----------|-----------------------------------------------------------------------------------------------------------------------------------------------------------------------|-----|-----|----|
| DM8/21         | % of patients with DM who have a record of retinal screening in the previous 15 months                                                          | Recording  | 1-2       | DM8      | The percentage of patients with diabetes who have a record of retinal screening in the previous 15 months                                                             | 25  | 90  | 5  |
|                |                                                                                                                                                 |            | 3-8       | DM21     |                                                                                                                                                                       |     |     |    |
| DM9            | % patients with DM with a record of presence or absence of peripheral pulses in the previous 15 months                                          | Recording  | 1-7       |          | The percentage of patients with diabetes with a record of presence or absence of peripheral pulses in the previous 15 months                                          | 40  | 90  | 3  |
| DM10           | % patients with DM with a record of neuropathy testing in the previous 15 months                                                                | Recording  | 1-2       | DM10     | The percentage of patients with diabetes with a record of neuropathy testing in the previous 15 months                                                                | 25  | 90  | 3  |
|                |                                                                                                                                                 |            | 3-8       |          |                                                                                                                                                                       |     |     |    |
| DM11           | % patients with DM whose notes have a record of blood pressure in previous 15m                                                                  | Monitoring | 1-2       | DM11     | The percentage of patients with diabetes who have a record of the blood pressure in the past 15 months                                                                | 25  | 90  | 3  |
|                |                                                                                                                                                 |            | 3-7       |          |                                                                                                                                                                       |     |     |    |
| DM12/30        | % patients with DM, with last blood pressure reading (15m) is 145/85 or less                                                                    | Outcome    | 1-2       | DM12     | The percentage of patients with diabetes in whom the last blood pressure is 145/85 or less                                                                            | 25  | 55  | 17 |
|                |                                                                                                                                                 |            | 3-7       |          |                                                                                                                                                                       |     |     |    |
|                |                                                                                                                                                 |            | 8         | DM30     |                                                                                                                                                                       |     |     |    |
| DM13           | % patients with DM who have a record of micro-albuminuria testing in the previous 15 months (exception reporting for patients with proteinuria) | Recording  | 1-2       | DM13     | The percentage of patients with diabetes who have a record of micro-albuminuria testing in the previous 15 months (exception reporting for patients with proteinuria) | 25  | 90  | 3  |
|                |                                                                                                                                                 |            | 3-8       |          |                                                                                                                                                                       |     |     |    |
| DM14/22        | % patients with DM, with record of serum creatinine testing in previous 15m                                                                     | Monitoring | 1-2       | DM14     | The percentage of patients with diabetes who have a record of serum creatinine testing in the previous 15 months                                                      | 25  | 90  | 3  |
|                |                                                                                                                                                 |            | 3-8       | DM22     |                                                                                                                                                                       |     |     |    |
|                |                                                                                                                                                 |            |           |          | The percentage of patients with diabetes who have a record of estimated glomerular filtration rate (eGFR) or serum creatinine testing in the previous 15 months       | 40  | 90  | 3  |

| Indicator name | CPRD definition                                                                                                  | Type       | QOF year* | QOF name | QOF definition                                                                                                                         | Lt† | Ut† | P† |
|----------------|------------------------------------------------------------------------------------------------------------------|------------|-----------|----------|----------------------------------------------------------------------------------------------------------------------------------------|-----|-----|----|
| DM15           | % patients with DM with proteinuria or micro-albuminuria who are treated with ACE inhibitors (or A2 antagonists) | Treatment  | 1-2       |          | The percentage of patients with diabetes with proteinuria or micro-albuminuria who are treated with ACE inhibitors (or A2 antagonists) | 25  | 70  | 3  |
|                |                                                                                                                  |            | 3-8       |          |                                                                                                                                        | 40  | 80  | 3  |
| DM16           | % patients with DM whose notes have a record of total cholesterol in previous 15m                                | Monitoring | 1-2       | DM16     | The percentage of patients with diabetes who have a record of total cholesterol in the previous 15 months                              | 25  | 90  | 3  |
|                |                                                                                                                  |            | 3-7       |          |                                                                                                                                        | 40  | 90  | 3  |
| DM17           | % patients with DM whose last measured total cholesterol (15m) ≤ 5mmol/l                                         | Outcome    | 1-2       | DM17     | The percentage of patients with diabetes whose last measured total cholesterol within previous 15 months is 5 or less                  | 25  | 60  | 6  |
|                |                                                                                                                  |            | 3-8       |          |                                                                                                                                        | 40  | 70  | 6  |
| DM18           | % patients with DM with a record of influenza vaccination in preceding 1Sep-31Mar                                | Treatment  | 1-2       | DM18     | The percentage of patients with diabetes who have had influenza immunisation in the preceding 1 September to 31 March                  | 25  | 85  | 3  |
|                |                                                                                                                  |            | 3-8       |          |                                                                                                                                        | 40  | 85  | 3  |

\* QOF year 1 corresponds to 2004/5, 2 to 2005/6 and so on, up to year 8 (2010/11).

† Lt: Lower threshold; Ut: Upper threshold; P: points indicator is worth (1 point≈£126). Also,  $P = \min\{(Ut - Lt), (RA - Lt)/(Ut - Lt)\}$ , where *RA* is the practice reported achievement (excluding exception reported patients) under the Quality and Outcomes Framework.

Table A4: Counts (column percentages) for all exception codes identified, over time and overall.

| CPRD code | Read code | Description                                                     | Persistent | Type*             | 2006/7           | 2007/8           | 2008/9           | 2009/10          | 2010/11          | 2011/12          | Total             |
|-----------|-----------|-----------------------------------------------------------------|------------|-------------------|------------------|------------------|------------------|------------------|------------------|------------------|-------------------|
| 10674     | 9OX5.00   | Influenza vaccination declined                                  | No         | Informed dissent  | 73165<br>(14.89) | 79180<br>(15.51) | 73053<br>(14.88) | 68516<br>(13.84) | 73704<br>(14.90) | 65346<br>(14.26) | 432964<br>(14.72) |
| 10996     | 2126200   | Asthma resolved                                                 | Yes        | Contra-indication | 23227<br>(4.73)  | 25184<br>(4.93)  | 27403<br>(5.58)  | 27939<br>(5.65)  | 28040<br>(5.67)  | 26414<br>(5.77)  | 158207<br>(5.38)  |
| 11695     | 9hA2.00   | Excepted from asthma quality indicators:<br>Informed dissent    | No         | Informed dissent  | 17106<br>(3.48)  | 18526<br>(3.63)  | 20774<br>(4.23)  | 21162<br>(4.28)  | 22507<br>(4.55)  | 22749<br>(4.97)  | 122824<br>(4.18)  |
| 19439     | 212S.00   | Depression resolved                                             | Yes        | Contra-indication | 7694<br>(1.57)   | 12427<br>(2.43)  | 14695<br>(2.99)  | 18329<br>(3.70)  | 22558<br>(4.56)  | 25769<br>(5.62)  | 101472<br>(3.45)  |
| 12267     | 68NE.00   | No consent - influenza imm.                                     | No         | Informed dissent  | 16121<br>(3.28)  | 18248<br>(3.57)  | 14851<br>(3.02)  | 14971<br>(3.03)  | 15357<br>(3.10)  | 13846<br>(3.02)  | 93394<br>(3.18)   |
| 10566     | 8I62.00   | Beta blocker not indicated                                      | No         | Contra-indication | 16002<br>(3.26)  | 17035<br>(3.34)  | 14716<br>(3.00)  | 13716<br>(2.77)  | 10838<br>(2.19)  | 8778<br>(1.92)   | 81085<br>(2.76)   |
| 11667     | TJC6.00   | Adverse reaction to betablockers                                | Yes        | Contra-indication | 10788<br>(2.20)  | 11600<br>(2.27)  | 12493<br>(2.54)  | 14491<br>(2.93)  | 14301<br>(2.89)  | 12680<br>(2.77)  | 76353<br>(2.60)   |
| 10976     | 9h32.00   | Excepted from hypertension qual indicators:<br>Informed dissent | No         | Informed dissent  | 8685<br>(1.77)   | 9845<br>(1.93)   | 11183<br>(2.28)  | 12666<br>(2.56)  | 13087<br>(2.65)  | 11631<br>(2.54)  | 67097<br>(2.28)   |
| 11056     | 8BL0.00   | Patient on maximal tolerated antihypertensive therapy           | No         | Contra-indication | 13852<br>(2.82)  | 13391<br>(2.62)  | 12793<br>(2.61)  | 10158<br>(2.05)  | 8406<br>(1.70)   | 7881<br>(1.72)   | 66481<br>(2.26)   |
| 11348     | 9h42.00   | Excepted from diabetes quality indicators:<br>Informed dissent  | No         | Informed dissent  | 8115<br>(1.65)   | 9209<br>(1.80)   | 10000<br>(2.04)  | 11556<br>(2.33)  | 12060<br>(2.44)  | 11261<br>(2.46)  | 62201<br>(2.12)   |
| 10567     | 8I26.00   | Beta blocker contraindicated                                    | No         | Contra-indication | 16714<br>(3.40)  | 12741<br>(2.50)  | 10472<br>(2.13)  | 9188<br>(1.86)   | 6167<br>(1.25)   | 4967<br>(1.08)   | 60249<br>(2.05)   |
| 11416     | U60CA00   | [X]Statin causing adverse effect in therapeutic use             | Yes        | Contra-indication | 7423<br>(1.51)   | 8941<br>(1.75)   | 10150<br>(2.07)  | 10731<br>(2.17)  | 10976<br>(2.22)  | 10987<br>(2.40)  | 59208<br>(2.01)   |
| 11130     | U60C400   | [X]Angiotensin-convert-enz inhib caus advers eff therap use     | Yes        | Contra-indication | 6495<br>(1.32)   | 8409<br>(1.65)   | 9515<br>(1.94)   | 9974<br>(2.02)   | 9895<br>(2.00)   | 9734<br>(2.12)   | 54022<br>(1.84)   |
| 10883     | 8I64.00   | Angiotensin converting enzyme inhibitor not indicated           | No         | Contra-indication | 10297<br>(2.10)  | 12488<br>(2.45)  | 9431<br>(1.92)   | 6233<br>(1.26)   | 5700<br>(1.15)   | 5198<br>(1.13)   | 49347<br>(1.68)   |
| 18721     | 8I6C.00   | Angiotensin II receptor antagonist not indicated                | No         | Contra-indication | 9425<br>(1.92)   | 12444<br>(2.44)  | 9177<br>(1.87)   | 6221<br>(1.26)   | 5948<br>(1.20)   | 5530<br>(1.21)   | 48745<br>(1.66)   |
| 28994     | 212R.00   | Atrial fibrillation resolved                                    | Yes        | Contra-indication | 4625<br>(0.94)   | 6336<br>(1.24)   | 7529<br>(1.53)   | 8352<br>(1.69)   | 8823<br>(1.78)   | 9191<br>(2.01)   | 44856<br>(1.53)   |
| 12213     | 8BL2.00   | Patient on maximal tolerated therapy for diabetes               | No         | Contra-indication | 4517<br>(0.92)   | 4840<br>(0.95)   | 4414<br>(0.90)   | 9379<br>(1.90)   | 11944<br>(2.41)  | 8835<br>(1.93)   | 43929<br>(1.49)   |

| CPRD code | Read code | Description                                                  | Persistent | Type*             | 2006/7          | 2007/8         | 2008/9         | 2009/10        | 2010/11        | 2011/12        | Total           |
|-----------|-----------|--------------------------------------------------------------|------------|-------------------|-----------------|----------------|----------------|----------------|----------------|----------------|-----------------|
| 3269      | 2126100   | Hypertension resolved                                        | Yes        | Contra-indication | 5333<br>(1.09)  | 6275<br>(1.23) | 7035<br>(1.43) | 7226<br>(1.46) | 7384<br>(1.49) | 7640<br>(1.67) | 40893<br>(1.39) |
| 10813     | 8I3C.00   | Statin declined                                              | No         | Informed dissent  | 5833<br>(1.19)  | 6079<br>(1.19) | 6141<br>(1.25) | 6312<br>(1.28) | 6972<br>(1.41) | 6541<br>(1.43) | 37878<br>(1.29) |
| 11774     | 9h91.00   | Except from mental health quality indicators: Patient unsuit | No         | Contra-indication | 15090<br>(3.07) | 6140<br>(1.20) | 5771<br>(1.18) | 4141<br>(0.84) | 3230<br>(0.65) | 3265<br>(0.71) | 37637<br>(1.28) |
| 9998      | TJ53.11   | Adverse reaction to aspirin                                  | Yes        | Contra-indication | 5760<br>(1.17)  | 5843<br>(1.14) | 6233<br>(1.27) | 6633<br>(1.34) | 6467<br>(1.31) | 6118<br>(1.34) | 37054<br>(1.26) |
| 11026     | 9h51.00   | Excepted from COPD quality indicators: Patient unsuitable    | No         | Contra-indication | 7467<br>(1.52)  | 6712<br>(1.31) | 5922<br>(1.21) | 6438<br>(1.30) | 5744<br>(1.16) | 4532<br>(0.99) | 36815<br>(1.25) |
| 10961     | 9h31.00   | Excepted from hypertension qual indicators: Patient unsuit   | No         | Contra-indication | 8667<br>(1.76)  | 6961<br>(1.36) | 5775<br>(1.18) | 5693<br>(1.15) | 5352<br>(1.08) | 4031<br>(0.88) | 36479<br>(1.24) |
| 11041     | 9h41.00   | Excepted from diabetes qual indicators: Patient unsuitable   | No         | Contra-indication | 7474<br>(1.52)  | 6328<br>(1.24) | 5576<br>(1.14) | 6106<br>(1.23) | 6095<br>(1.23) | 4829<br>(1.05) | 36408<br>(1.24) |
| 10910     | 9h02.00   | Excepted from CHD quality indicators: Informed dissent       | No         | Informed dissent  | 5927<br>(1.21)  | 5801<br>(1.14) | 6113<br>(1.24) | 6006<br>(1.21) | 5792<br>(1.17) | 5169<br>(1.13) | 34808<br>(1.18) |
| 11387     | 9OJ2.00   | Refuses asthma monitoring                                    | No         | Informed dissent  | 6469<br>(1.32)  | 6902<br>(1.35) | 5557<br>(1.13) | 5487<br>(1.11) | 4923<br>(1.00) | 3024<br>(0.66) | 32362<br>(1.10) |
| 43239     | 9hC1.00   | Excepted from depression quality indicators: Informed dissen | No         | Informed dissent  | 2269<br>(0.46)  | 3468<br>(0.68) | 4552<br>(0.93) | 6421<br>(1.30) | 7234<br>(1.46) | 7486<br>(1.63) | 31430<br>(1.07) |
| 12111     | 8BL1.00   | Patient on maximal tolerated lipid lowering therapy          | No         | Contra-indication | 5758<br>(1.17)  | 4971<br>(0.97) | 4687<br>(0.95) | 5434<br>(1.10) | 4958<br>(1.00) | 4489<br>(0.98) | 30297<br>(1.03) |
| 11038     | 9h01.00   | Excepted from CHD quality indicators: Patient unsuitable     | No         | Contra-indication | 7385<br>(1.50)  | 5853<br>(1.15) | 4982<br>(1.01) | 4624<br>(0.93) | 4104<br>(0.83) | 3180<br>(0.69) | 30128<br>(1.02) |
| 12561     | 8I6B.00   | Clopidogrel not indicated                                    | No         | Contra-indication | 6180<br>(1.26)  | 6018<br>(1.18) | 4589<br>(0.93) | 4300<br>(0.87) | 4493<br>(0.91) | 4463<br>(0.97) | 30043<br>(1.02) |
| 28970     | 9hC0.00   | Excepted from depression quality indicators: Patient unsuita | No         | Contra-indication | 3845<br>(0.78)  | 4663<br>(0.91) | 4346<br>(0.89) | 5575<br>(1.13) | 5480<br>(1.11) | 5225<br>(1.14) | 29134<br>(0.99) |
| 11266     | 9h52.00   | Excepted from COPD quality indicators: Informed dissent      | No         | Informed dissent  | 3428<br>(0.70)  | 4425<br>(0.87) | 4768<br>(0.97) | 5444<br>(1.10) | 5680<br>(1.15) | 5376<br>(1.17) | 29121<br>(0.99) |
| 11328     | 8I65.00   | Warfarin not indicated                                       | No         | Contra-indication | 5924<br>(1.21)  | 5793<br>(1.13) | 4367<br>(0.89) | 3960<br>(0.80) | 4273<br>(0.86) | 4057<br>(0.89) | 28374<br>(0.96) |
| 2526      | TJ53.00   | Adverse reaction to salicylates                              | Yes        | Contra-indication | 4477<br>(0.91)  | 4973<br>(0.97) | 5043<br>(1.03) | 4709<br>(0.95) | 4353<br>(0.88) | 3840<br>(0.84) | 27395<br>(0.93) |
| 12619     | 9hG1.00   | Excepted from smoking quality indicators: Informed dissent   | No         | Informed dissent  | 2819<br>(0.57)  | 3657<br>(0.72) | 4574<br>(0.93) | 5512<br>(1.11) | 5400<br>(1.09) | 5164<br>(1.13) | 27126<br>(0.92) |
| 11039     | 9h21.00   | Excepted from stroke quality indicators: Patient unsuitable  | No         | Contra-indication | 6263<br>(1.27)  | 4951<br>(0.97) | 4669<br>(0.95) | 4117<br>(0.83) | 3789<br>(0.77) | 3116<br>(0.68) | 26905<br>(0.91) |

| CPRD code | Read code | Description                                                  | Persistent | Type*             | 2006/7         | 2007/8         | 2008/9         | 2009/10        | 2010/11        | 2011/12        | Total           |
|-----------|-----------|--------------------------------------------------------------|------------|-------------------|----------------|----------------|----------------|----------------|----------------|----------------|-----------------|
| 12860     | 9hE0.00   | Except chronic kidney disease qual indic: Patient unsuitable | No         | Contra-indication | 2705<br>(0.55) | 3843<br>(0.75) | 3439<br>(0.70) | 5752<br>(1.16) | 6196<br>(1.25) | 4526<br>(0.99) | 26461<br>(0.90) |
| 6175      | 8I24.00   | Aspirin prophylaxis contra-indicated                         | No         | Contra-indication | 8230<br>(1.67) | 5947<br>(1.16) | 4156<br>(0.85) | 3015<br>(0.61) | 2566<br>(0.52) | 1993<br>(0.43) | 25907<br>(0.88) |
| 11673     | 9hA1.00   | Excepted from asthma quality indicators: Patient unsuitable  | No         | Contra-indication | 5476<br>(1.11) | 4355<br>(0.85) | 3730<br>(0.76) | 3819<br>(0.77) | 3567<br>(0.72) | 2863<br>(0.62) | 23810<br>(0.81) |
| 10512     | 8I66.00   | Aspirin not indicated                                        | No         | Contra-indication | 4322<br>(0.88) | 4376<br>(0.86) | 3729<br>(0.76) | 3895<br>(0.79) | 3566<br>(0.72) | 3747<br>(0.82) | 23635<br>(0.80) |
| 11752     | 8BL3.00   | Patient on maximal tolerated anticonvulsant therapy          | No         | Contra-indication | 3877<br>(0.79) | 3788<br>(0.74) | 3867<br>(0.79) | 3370<br>(0.68) | 3266<br>(0.66) | 3670<br>(0.80) | 21838<br>(0.74) |
| 12262     | 8I3X.00   | Diabetic retinopathy screening refused                       | No         | Informed dissent  | 3059<br>(0.62) | 4835<br>(0.95) | 5436<br>(1.11) | 4914<br>(0.99) | 2389<br>(0.48) | 836<br>(0.18)  | 21469<br>(0.73) |
| 13031     | TJC2400   | Adverse reaction to simvastatin                              | Yes        | Contra-indication | 1936<br>(0.39) | 2827<br>(0.55) | 3553<br>(0.72) | 4022<br>(0.81) | 4330<br>(0.88) | 4493<br>(0.98) | 21161<br>(0.72) |
| 12732     | 8I6a.00   | Dipyridamole not indicated                                   | No         | Contra-indication | 1936<br>(0.39) | 2768<br>(0.54) | 2667<br>(0.54) | 3411<br>(0.69) | 3969<br>(0.80) | 4179<br>(0.91) | 18930<br>(0.64) |
| 11231     | 8I73.00   | Beta blocker not tolerated                                   | No         | Contra-indication | 3600<br>(0.73) | 3422<br>(0.67) | 2977<br>(0.61) | 2608<br>(0.53) | 1918<br>(0.39) | 1618<br>(0.35) | 16143<br>(0.55) |
| 19342     | 212K.00   | Hypertension resolved                                        | Yes        | Contra-indication | 1761<br>(0.36) | 2013<br>(0.39) | 2650<br>(0.54) | 2842<br>(0.57) | 3053<br>(0.62) | 3211<br>(0.70) | 15530<br>(0.53) |
| 11601     | U60CB00   | [X]Angiotensin II receptor antag adverse effect therap use   | Yes        | Contra-indication | 1743<br>(0.35) | 2419<br>(0.47) | 2670<br>(0.54) | 2857<br>(0.58) | 2905<br>(0.59) | 2796<br>(0.61) | 15390<br>(0.52) |
| 10681     | 8I63.00   | Statin not indicated                                         | No         | Contra-indication | 3758<br>(0.76) | 3222<br>(0.63) | 2562<br>(0.52) | 2027<br>(0.41) | 1904<br>(0.38) | 1886<br>(0.41) | 15359<br>(0.52) |
| 11352     | 14LK.00   | H/O: aspirin allergy                                         | Yes        | Contra-indication | 2215<br>(0.45) | 2465<br>(0.48) | 2646<br>(0.54) | 2702<br>(0.55) | 2645<br>(0.53) | 2427<br>(0.53) | 15100<br>(0.51) |
| 11529     | 8I76.00   | Statin not tolerated                                         | No         | Contra-indication | 2328<br>(0.47) | 2246<br>(0.44) | 2346<br>(0.48) | 2634<br>(0.53) | 2558<br>(0.52) | 2298<br>(0.50) | 14410<br>(0.49) |
| 11750     | 9h92.00   | Except from mental health quality indicators: Informed diss  | No         | Informed dissent  | 1652<br>(0.34) | 1821<br>(0.36) | 2051<br>(0.42) | 2563<br>(0.52) | 2687<br>(0.54) | 3457<br>(0.75) | 14231<br>(0.48) |
| 11074     | 9h22.00   | Excepted from stroke quality indicators: Informed dissent    | No         | Informed dissent  | 1935<br>(0.39) | 2049<br>(0.40) | 2253<br>(0.46) | 2173<br>(0.44) | 2254<br>(0.46) | 2243<br>(0.49) | 12907<br>(0.44) |
| 30300     | U60B700   | [X]Beta-adrenorecep antag caus advers eff in ther use, NEC   | Yes        | Contra-indication | 2026<br>(0.41) | 2099<br>(0.41) | 2119<br>(0.43) | 2117<br>(0.43) | 2033<br>(0.41) | 1807<br>(0.39) | 12201<br>(0.41) |
| 11164     | 8I70.00   | Aspirin not tolerated                                        | No         | Contra-indication | 2466<br>(0.50) | 2368<br>(0.46) | 1898<br>(0.39) | 1354<br>(0.27) | 1385<br>(0.28) | 1238<br>(0.27) | 10709<br>(0.36) |
| 20747     | TJC7900   | Adverse reaction to ramipril                                 | Yes        | Contra-indication | 827<br>(0.17)  | 1267<br>(0.25) | 1618<br>(0.33) | 1904<br>(0.38) | 2107<br>(0.43) | 2217<br>(0.48) | 9940<br>(0.34)  |



| CPRD code | Read code | Description                                                  | Persistent | Type*             | 2006/7         | 2007/8         | 2008/9         | 2009/10        | 2010/11        | 2011/12        | Total          |
|-----------|-----------|--------------------------------------------------------------|------------|-------------------|----------------|----------------|----------------|----------------|----------------|----------------|----------------|
| 12560     | 8I6N.00   | Anticoagulation not indicated                                | No         | Contra-indication | 1467<br>(0.30) | 1968<br>(0.39) | 1498<br>(0.31) | 1330<br>(0.27) | 1888<br>(0.38) | 1615<br>(0.35) | 9766<br>(0.33) |
| 18824     | 8I3W.00   | Diabetic foot examination declined                           | No         | Informed dissent  | 1038<br>(0.21) | 1281<br>(0.25) | 1485<br>(0.30) | 1652<br>(0.33) | 1652<br>(0.33) | 2490<br>(0.54) | 9598<br>(0.33) |
| 8385      | 2126000   | Epilepsy resolved                                            | Yes        | Contra-indication | 1432<br>(0.29) | 1465<br>(0.29) | 1653<br>(0.34) | 1670<br>(0.34) | 1647<br>(0.33) | 1647<br>(0.36) | 9514<br>(0.32) |
| 35383     | 9OLD.00   | Diabetic patient unsuitable for digital retinal photography  | No         | Contra-indication | 1337<br>(0.27) | 1627<br>(0.32) | 1506<br>(0.31) | 1619<br>(0.33) | 1690<br>(0.34) | 1692<br>(0.37) | 9471<br>(0.32) |
| 13029     | U604800   | [X]Clopidogrel causing adverse effects in therapeutic use    | Yes        | Contra-indication | 1201<br>(0.24) | 1412<br>(0.28) | 1640<br>(0.33) | 1749<br>(0.35) | 1709<br>(0.35) | 1649<br>(0.36) | 9360<br>(0.32) |
| 10568     | 8I28.00   | Angiotensin converting enzyme inhibitors contraindicated     | No         | Contra-indication | 2516<br>(0.51) | 2337<br>(0.46) | 1494<br>(0.30) | 1040<br>(0.21) | 841<br>(0.17)  | 827<br>(0.18)  | 9055<br>(0.31) |
| 11350     | 8I74.00   | Angiotensin converting enzyme inhibitor not tolerated        | No         | Contra-indication | 2114<br>(0.43) | 2220<br>(0.43) | 1578<br>(0.32) | 1075<br>(0.22) | 951<br>(0.19)  | 946<br>(0.21)  | 8884<br>(0.30) |
| 13033     | 14LL.00   | H/O: betablocker allergy                                     | Yes        | Contra-indication | 1059<br>(0.22) | 1228<br>(0.24) | 1510<br>(0.31) | 1664<br>(0.34) | 1628<br>(0.33) | 1571<br>(0.34) | 8660<br>(0.29) |
| 10684     | 8I2F.00   | Influenza vaccination contraindicated                        | No         | Contra-indication | 872<br>(0.18)  | 756<br>(0.15)  | 1348<br>(0.27) | 1667<br>(0.34) | 1883<br>(0.38) | 2024<br>(0.44) | 8550<br>(0.29) |
| 11672     | 9h61.00   | Excepted from epilepsy quality indicators: Patient unsuitabl | No         | Contra-indication | 2169<br>(0.44) | 1663<br>(0.33) | 1421<br>(0.29) | 1065<br>(0.22) | 1017<br>(0.21) | 1041<br>(0.23) | 8376<br>(0.28) |
| 19391     | 33BE.00   | Exercise tolerance test contraindicated                      | Yes        | Contra-indication | 1061<br>(0.22) | 1333<br>(0.26) | 1531<br>(0.31) | 1611<br>(0.33) | 1549<br>(0.31) | 1274<br>(0.28) | 8359<br>(0.28) |
| 11014     | 8I38.00   | Aspirin prophylaxis refused                                  | No         | Informed dissent  | 1569<br>(0.32) | 1499<br>(0.29) | 1343<br>(0.27) | 1334<br>(0.27) | 1285<br>(0.26) | 1128<br>(0.25) | 8158<br>(0.28) |
| 11726     | 8I3Y.00   | Blood pressure procedure refused                             | No         | Informed dissent  | 1384<br>(0.28) | 1435<br>(0.28) | 1097<br>(0.22) | 1268<br>(0.26) | 1277<br>(0.26) | 1246<br>(0.27) | 7707<br>(0.26) |
| 18747     | 8I6F.00   | Diabetic retinopathy screening not indicated                 | No         | Contra-indication | 1595<br>(0.32) | 2022<br>(0.40) | 1725<br>(0.35) | 1308<br>(0.26) | 610<br>(0.12)  | 224<br>(0.05)  | 7484<br>(0.25) |
| 12247     | 8I6G.00   | Diabetic foot examination not indicated                      | No         | Contra-indication | 1196<br>(0.24) | 1444<br>(0.28) | 1612<br>(0.33) | 1319<br>(0.27) | 862<br>(0.17)  | 854<br>(0.19)  | 7287<br>(0.25) |
| 40100     | 9hE1.00   | Exc chronic kidney disease quality indicators: Inform dissen | No         | Informed dissent  | 303<br>(0.06)  | 694<br>(0.14)  | 854<br>(0.17)  | 1491<br>(0.30) | 1896<br>(0.38) | 1862<br>(0.41) | 7100<br>(0.24) |
| 11712     | 9h62.00   | Excepted from epilepsy quality indicators: Informed dissent  | No         | Informed dissent  | 1075<br>(0.22) | 1064<br>(0.21) | 1204<br>(0.25) | 1240<br>(0.25) | 1261<br>(0.25) | 1220<br>(0.27) | 7064<br>(0.24) |
| 10508     | 8I25.00   | Warfarin contraindicated                                     | No         | Contra-indication | 2126<br>(0.43) | 1307<br>(0.26) | 1004<br>(0.20) | 832<br>(0.17)  | 922<br>(0.19)  | 749<br>(0.16)  | 6940<br>(0.24) |
| 10767     | 8I36.00   | Beta blocker therapy refused                                 | No         | Informed dissent  | 1465<br>(0.30) | 1321<br>(0.26) | 1160<br>(0.24) | 1142<br>(0.23) | 990<br>(0.20)  | 752<br>(0.16)  | 6830<br>(0.23) |

| CPRD code | Read code | Description                                                  | Persistent | Type*             | 2006/7         | 2007/8         | 2008/9         | 2009/10        | 2010/11        | 2011/12        | Total          |
|-----------|-----------|--------------------------------------------------------------|------------|-------------------|----------------|----------------|----------------|----------------|----------------|----------------|----------------|
| 30674     | 8I2M.00   | Spirometry reversibility testing contraindicated             | No         | Contra-indication | 1351<br>(0.27) | 1384<br>(0.27) | 1272<br>(0.26) | 1136<br>(0.23) | 1007<br>(0.20) | 647<br>(0.14)  | 6797<br>(0.23) |
| 30644     | 9hG0.00   | Excepted from smoking quality indicators: Patient unsuitable | No         | Contra-indication | 1673<br>(0.34) | 1263<br>(0.25) | 1107<br>(0.23) | 1240<br>(0.25) | 721<br>(0.15)  | 693<br>(0.15)  | 6697<br>(0.23) |
| 13026     | TJC6200   | Adverse reaction to atenolol                                 | Yes        | Contra-indication | 1239<br>(0.25) | 1068<br>(0.21) | 1063<br>(0.22) | 1077<br>(0.22) | 1072<br>(0.22) | 1012<br>(0.22) | 6531<br>(0.22) |
| 11407     | 8I2K.00   | Clopidogrel contraindicated                                  | No         | Contra-indication | 1994<br>(0.41) | 1403<br>(0.27) | 981<br>(0.20)  | 763<br>(0.15)  | 741<br>(0.15)  | 610<br>(0.13)  | 6492<br>(0.22) |
| 26349     | 8I3b.00   | Spirometry test declined                                     | No         | Informed dissent  | 852<br>(0.17)  | 1118<br>(0.22) | 965<br>(0.20)  | 1170<br>(0.24) | 1221<br>(0.25) | 1112<br>(0.24) | 6438<br>(0.22) |
| 12088     | 14LJ.00   | H/O: influenza vaccine allergy                               | Yes        | Contra-indication | 941<br>(0.19)  | 1054<br>(0.21) | 1096<br>(0.22) | 1103<br>(0.22) | 1077<br>(0.22) | 1010<br>(0.22) | 6281<br>(0.21) |
| 13043     | 14LM.00   | H/O: angiotensin converting enzyme inhibitor allergy         | Yes        | Contra-indication | 813<br>(0.17)  | 974<br>(0.19)  | 1065<br>(0.22) | 1113<br>(0.22) | 1085<br>(0.22) | 1175<br>(0.26) | 6225<br>(0.21) |
| 11465     | 8I6D.00   | Influenza vaccination not indicated                          | No         | Contra-indication | 3092<br>(0.63) | 882<br>(0.17)  | 603<br>(0.12)  | 488<br>(0.10)  | 381<br>(0.08)  | 416<br>(0.09)  | 5862<br>(0.20) |
| 13030     | TJ42100   | Adverse reaction to warfarin sodium                          | Yes        | Contra-indication | 720<br>(0.15)  | 828<br>(0.16)  | 993<br>(0.20)  | 1073<br>(0.22) | 1087<br>(0.22) | 1010<br>(0.22) | 5711<br>(0.19) |
| 11510     | 8I2H.00   | Angiotensin II receptor antagonists contraindicated          | No         | Contra-indication | 1367<br>(0.28) | 1495<br>(0.29) | 1033<br>(0.21) | 654<br>(0.13)  | 524<br>(0.11)  | 497<br>(0.11)  | 5570<br>(0.19) |
| 12135     | 8I3D.00   | Angiotensin converting enzyme inhibitor declined             | No         | Informed dissent  | 1169<br>(0.24) | 1428<br>(0.28) | 994<br>(0.20)  | 736<br>(0.15)  | 617<br>(0.12)  | 482<br>(0.11)  | 5426<br>(0.18) |
| 12848     | 212J.00   | Epilepsy resolved                                            | Yes        | Contra-indication | 746<br>(0.15)  | 827<br>(0.16)  | 888<br>(0.18)  | 947<br>(0.19)  | 944<br>(0.19)  | 982<br>(0.21)  | 5334<br>(0.18) |
| 28995     | 9hF0.00   | Except from atr fib quality indicators: Patient unsuitable   | No         | Contra-indication | 906<br>(0.18)  | 1071<br>(0.21) | 908<br>(0.18)  | 874<br>(0.18)  | 871<br>(0.18)  | 704<br>(0.15)  | 5334<br>(0.18) |
| 30573     | U605100   | [X]Salicylates causing adverse effects in therapeutic use    | Yes        | Contra-indication | 722<br>(0.15)  | 810<br>(0.16)  | 894<br>(0.18)  | 937<br>(0.19)  | 929<br>(0.19)  | 896<br>(0.20)  | 5188<br>(0.18) |
| 28622     | 2126300   | Diabetes resolved                                            | Yes        | Contra-indication | 573<br>(0.12)  | 716<br>(0.14)  | 854<br>(0.17)  | 914<br>(0.18)  | 955<br>(0.19)  | 1072<br>(0.23) | 5084<br>(0.17) |
| 12813     | 8I3E.00   | Warfarin declined                                            | No         | Informed dissent  | 728<br>(0.15)  | 795<br>(0.16)  | 717<br>(0.15)  | 698<br>(0.14)  | 878<br>(0.18)  | 1034<br>(0.23) | 4850<br>(0.16) |
| 13025     | U60K400   | [X]Influenza vaccine causing adverse effects therapeutic use | Yes        | Contra-indication | 656<br>(0.13)  | 763<br>(0.15)  | 805<br>(0.16)  | 808<br>(0.16)  | 788<br>(0.16)  | 787<br>(0.17)  | 4607<br>(0.16) |
| 12827     | 8I6L.00   | Spirometry not indicated                                     | No         | Contra-indication | 678<br>(0.14)  | 831<br>(0.16)  | 755<br>(0.15)  | 690<br>(0.14)  | 767<br>(0.16)  | 783<br>(0.17)  | 4504<br>(0.15) |
| 12571     | 8I75.00   | Angiotensin II receptor antagonist not tolerated             | No         | Contra-indication | 789<br>(0.16)  | 1041<br>(0.20) | 943<br>(0.19)  | 583<br>(0.12)  | 504<br>(0.10)  | 464<br>(0.10)  | 4324<br>(0.15) |

| CPRD code | Read code | Description                                                     | Persistent | Type*                 | 2006/7         | 2007/8         | 2008/9        | 2009/10       | 2010/11       | 2011/12       | Total          |
|-----------|-----------|-----------------------------------------------------------------|------------|-----------------------|----------------|----------------|---------------|---------------|---------------|---------------|----------------|
| 22335     | 8I3P.00   | Angiotensin II receptor antagonist declined                     | No         | Informed dissent      | 847<br>(0.17)  | 1204<br>(0.24) | 807<br>(0.16) | 528<br>(0.11) | 489<br>(0.10) | 367<br>(0.08) | 4242<br>(0.14) |
| 25917     | 9h72.00   | Excepted from thyroid quality indicators:<br>Informed dissent   | No         | Informed dissent      | 686<br>(0.14)  | 724<br>(0.14)  | 773<br>(0.16) | 707<br>(0.14) | 630<br>(0.13) | 694<br>(0.15) | 4214<br>(0.14) |
| 10808     | 8I27.00   | Statins contraindicated                                         | No         | Contra-<br>indication | 1170<br>(0.24) | 824<br>(0.16)  | 679<br>(0.14) | 545<br>(0.11) | 522<br>(0.11) | 417<br>(0.09) | 4157<br>(0.14) |
| 26495     | U60C414   | [X]Adverse reaction to lisinopril                               | Yes        | Contra-<br>indication | 399<br>(0.08)  | 507<br>(0.10)  | 581<br>(0.12) | 660<br>(0.13) | 696<br>(0.14) | 748<br>(0.16) | 3591<br>(0.12) |
| 12815     | 8I3R.00   | Clopidogrel declined                                            | No         | Informed dissent      | 640<br>(0.13)  | 670<br>(0.13)  | 557<br>(0.11) | 519<br>(0.10) | 577<br>(0.12) | 590<br>(0.13) | 3553<br>(0.12) |
| 19218     | 8I3S.00   | Exercise tolerance test refused                                 | Yes        | Informed dissent      | 584<br>(0.12)  | 607<br>(0.12)  | 617<br>(0.13) | 618<br>(0.12) | 545<br>(0.11) | 471<br>(0.10) | 3442<br>(0.12) |
| 18692     | 9hA..00   | Exception reporting: asthma quality indicators                  | No         | Unknown               | 542<br>(0.11)  | 1069<br>(0.21) | 759<br>(0.15) | 544<br>(0.11) | 325<br>(0.07) | 87<br>(0.02)  | 3326<br>(0.11) |
| 18766     | 212H.00   | Diabetes resolved                                               | Yes        | Contra-<br>indication | 331<br>(0.07)  | 409<br>(0.08)  | 481<br>(0.10) | 532<br>(0.11) | 583<br>(0.12) | 635<br>(0.14) | 2971<br>(0.10) |
| 21928     | TJC4400   | Adverse reaction to dipyridamole                                | Yes        | Contra-<br>indication | 200<br>(0.04)  | 290<br>(0.06)  | 489<br>(0.10) | 643<br>(0.13) | 667<br>(0.13) | 676<br>(0.15) | 2965<br>(0.10) |
| 30749     | 9hH0.00   | Excepted heart failure quality indicators: Patient<br>unsuitabl | No         | Contra-<br>indication | 159<br>(0.03)  | 558<br>(0.11)  | 627<br>(0.13) | 638<br>(0.13) | 473<br>(0.10) | 414<br>(0.09) | 2869<br>(0.10) |
| 31224     | 8I2b.00   | Dipyridamole contraindicated                                    | No         | Contra-<br>indication | 486<br>(0.10)  | 518<br>(0.10)  | 441<br>(0.09) | 478<br>(0.10) | 491<br>(0.10) | 389<br>(0.08) | 2803<br>(0.10) |
| 11685     | 9h71.00   | Excepted from thyroid quality indicators:<br>Patient unsuitable | No         | Contra-<br>indication | 755<br>(0.15)  | 520<br>(0.10)  | 400<br>(0.08) | 298<br>(0.06) | 341<br>(0.07) | 350<br>(0.08) | 2664<br>(0.09) |
| 89207     | 8I6d.00   | Spirometry reversibility testing not indicated                  | No         | Contra-<br>indication | 3<br>(0.00)    | 87<br>(0.02)   | 428<br>(0.09) | 751<br>(0.15) | 836<br>(0.17) | 493<br>(0.11) | 2598<br>(0.09) |
| 34108     | 9h3..00   | Exception reporting: hypertension quality<br>indicators         | No         | Unknown               | 595<br>(0.12)  | 498<br>(0.10)  | 458<br>(0.09) | 438<br>(0.09) | 315<br>(0.06) | 179<br>(0.04) | 2483<br>(0.08) |
| 30641     | 9hD0.00   | Excepted from dementia quality indicators:<br>Patient unsuitabl | No         | Contra-<br>indication | 320<br>(0.07)  | 440<br>(0.09)  | 378<br>(0.08) | 371<br>(0.07) | 358<br>(0.07) | 511<br>(0.11) | 2378<br>(0.08) |
| 11790     | 8I72.00   | Clopidogrel not tolerated                                       | No         | Contra-<br>indication | 476<br>(0.10)  | 505<br>(0.10)  | 408<br>(0.08) | 282<br>(0.06) | 380<br>(0.08) | 298<br>(0.07) | 2349<br>(0.08) |
| 28574     | 9h4..00   | Exception reporting: diabetes quality indicators                | No         | Unknown               | 501<br>(0.10)  | 469<br>(0.09)  | 439<br>(0.09) | 404<br>(0.08) | 282<br>(0.06) | 156<br>(0.03) | 2251<br>(0.08) |
| 13034     | TJC2500   | Adverse reaction to pravastatin                                 | Yes        | Contra-<br>indication | 197<br>(0.04)  | 282<br>(0.06)  | 363<br>(0.07) | 414<br>(0.08) | 458<br>(0.09) | 527<br>(0.12) | 2241<br>(0.08) |
| 21039     | TJC7800   | Adverse reaction to enalapril                                   | Yes        | Contra-<br>indication | 227<br>(0.05)  | 323<br>(0.06)  | 392<br>(0.08) | 419<br>(0.08) | 421<br>(0.09) | 405<br>(0.09) | 2187<br>(0.07) |

| CPRD code | Read code | Description                                                  | Persistent | Type*             | 2006/7         | 2007/8        | 2008/9        | 2009/10       | 2010/11       | 2011/12       | Total          |
|-----------|-----------|--------------------------------------------------------------|------------|-------------------|----------------|---------------|---------------|---------------|---------------|---------------|----------------|
| 12816     | 8I3n.00   | Dipyridamole declined                                        | No         | Informed dissent  | 222<br>(0.05)  | 305<br>(0.06) | 299<br>(0.06) | 411<br>(0.08) | 441<br>(0.09) | 460<br>(0.10) | 2138<br>(0.07) |
| 34360     | 9h9..00   | Exception reporting: mental health quality indicators        | No         | Unknown           | 1162<br>(0.24) | 498<br>(0.10) | 118<br>(0.02) | 120<br>(0.02) | 85<br>(0.02)  | 104<br>(0.02) | 2087<br>(0.07) |
| 34768     | TJ42.00   | Adverse reaction to anticoagulants                           | Yes        | Contra-indication | 176<br>(0.04)  | 260<br>(0.05) | 337<br>(0.07) | 392<br>(0.08) | 382<br>(0.08) | 381<br>(0.08) | 1928<br>(0.07) |
| 13046     | 8I2R.00   | Anticoagulation contraindicated                              | No         | Contra-indication | 403<br>(0.08)  | 411<br>(0.08) | 320<br>(0.07) | 257<br>(0.05) | 270<br>(0.05) | 238<br>(0.05) | 1899<br>(0.06) |
| 7309      | ZV14800   | [V]Personal history of aspirin allergy                       | Yes        | Contra-indication | 286<br>(0.06)  | 307<br>(0.06) | 328<br>(0.07) | 324<br>(0.07) | 311<br>(0.06) | 302<br>(0.07) | 1858<br>(0.06) |
| 12814     | 8I3d.00   | Anticoagulation declined                                     | No         | Informed dissent  | 262<br>(0.05)  | 342<br>(0.07) | 265<br>(0.05) | 246<br>(0.05) | 311<br>(0.06) | 286<br>(0.06) | 1712<br>(0.06) |
| 25369     | ZV14D00   | [V]PH angiotensin-converting-enzyme inhibitor allergy        | Yes        | Contra-indication | 261<br>(0.05)  | 267<br>(0.05) | 278<br>(0.06) | 264<br>(0.05) | 245<br>(0.05) | 234<br>(0.05) | 1549<br>(0.05) |
| 11613     | 9h11.00   | Excepted from LVD quality indicators: Patient unsuitable     | No         | Contra-indication | 1036<br>(0.21) | 322<br>(0.06) | 74<br>(0.02)  | 50<br>(0.01)  | 43<br>(0.01)  | 24<br>(0.01)  | 1549<br>(0.05) |
| 11789     | 8I71.00   | Warfarin not tolerated                                       | No         | Contra-indication | 269<br>(0.05)  | 275<br>(0.05) | 251<br>(0.05) | 182<br>(0.04) | 237<br>(0.05) | 167<br>(0.04) | 1381<br>(0.05) |
| 39114     | 9hF1.00   | Excepted from atrial fibrillation qual indic: Inform dissent | No         | Informed dissent  | 140<br>(0.03)  | 203<br>(0.04) | 226<br>(0.05) | 264<br>(0.05) | 223<br>(0.05) | 230<br>(0.05) | 1286<br>(0.04) |
| 13367     | U605112   | [X] Adverse reaction to aspirin                              | Yes        | Contra-indication | 183<br>(0.04)  | 199<br>(0.04) | 212<br>(0.04) | 227<br>(0.05) | 225<br>(0.05) | 216<br>(0.05) | 1262<br>(0.04) |
| 18717     | 9h5..00   | Exception reporting: COPD quality indicators                 | No         | Unknown           | 320<br>(0.07)  | 318<br>(0.06) | 222<br>(0.05) | 162<br>(0.03) | 96<br>(0.02)  | 138<br>(0.03) | 1256<br>(0.04) |
| 10963     | 9h0..00   | Exception reporting: CHD quality indicators                  | No         | Unknown           | 278<br>(0.06)  | 282<br>(0.06) | 234<br>(0.05) | 163<br>(0.03) | 122<br>(0.02) | 88<br>(0.02)  | 1167<br>(0.04) |
| 13040     | 14LN.00   | H/O: angiotensin II receptor antagonist allergy              | Yes        | Contra-indication | 155<br>(0.03)  | 196<br>(0.04) | 206<br>(0.04) | 201<br>(0.04) | 201<br>(0.04) | 189<br>(0.04) | 1148<br>(0.04) |
| 11703     | 9h81.00   | Excepted from cancer quality indicators: Patient unsuitable  | No         | Contra-indication | 395<br>(0.08)  | 212<br>(0.04) | 188<br>(0.04) | 132<br>(0.03) | 115<br>(0.02) | 83<br>(0.02)  | 1125<br>(0.04) |
| 32463     | 14LP.00   | H/O: warfarin allergy                                        | Yes        | Contra-indication | 132<br>(0.03)  | 154<br>(0.03) | 188<br>(0.04) | 206<br>(0.04) | 207<br>(0.04) | 198<br>(0.04) | 1085<br>(0.04) |
| 48970     | 9hC..00   | Exception reporting: depression quality indicators           | No         | Unknown           | 79<br>(0.02)   | 257<br>(0.05) | 295<br>(0.06) | 178<br>(0.04) | 109<br>(0.02) | 120<br>(0.03) | 1038<br>(0.04) |
| 43491     | 8I7J.00   | Dipyridamole not tolerated                                   | No         | Contra-indication | 93<br>(0.02)   | 191<br>(0.04) | 171<br>(0.03) | 167<br>(0.03) | 201<br>(0.04) | 142<br>(0.03) | 965<br>(0.03)  |
| 20916     | U60B711   | [X] Adverse reaction to betablockers                         | Yes        | Contra-indication | 122<br>(0.02)  | 131<br>(0.03) | 143<br>(0.03) | 159<br>(0.03) | 154<br>(0.03) | 140<br>(0.03) | 849<br>(0.03)  |

| CPRD code | Read code | Description                                                  | Persistent | Type*             | 2006/7        | 2007/8        | 2008/9        | 2009/10       | 2010/11       | 2011/12       | Total         |
|-----------|-----------|--------------------------------------------------------------|------------|-------------------|---------------|---------------|---------------|---------------|---------------|---------------|---------------|
| 30745     | 8I7A.00   | Anticoagulation not tolerated                                | No         | Contra-indication | 149<br>(0.03) | 199<br>(0.04) | 170<br>(0.03) | 93<br>(0.02)  | 127<br>(0.03) | 93<br>(0.02)  | 831<br>(0.03) |
| 10962     | 9h2..00   | Exception reporting: stroke quality indicators               | No         | Unknown           | 188<br>(0.04) | 144<br>(0.03) | 159<br>(0.03) | 130<br>(0.03) | 109<br>(0.02) | 79<br>(0.02)  | 809<br>(0.03) |
| 46626     | 9hE..00   | Exception reporting: chronic kidney disease quality indicato | No         | Unknown           | 70<br>(0.01)  | 250<br>(0.05) | 218<br>(0.04) | 84<br>(0.02)  | 87<br>(0.02)  | 56<br>(0.01)  | 765<br>(0.03) |
| 40805     | 9hD1.00   | Excepted from dementia quality indicators: Informed dissent  | No         | Informed dissent  | 68<br>(0.01)  | 85<br>(0.02)  | 124<br>(0.03) | 110<br>(0.02) | 164<br>(0.03) | 143<br>(0.03) | 694<br>(0.02) |
| 42993     | TJC6z00   | Adverse reaction to betablockers NOS                         | Yes        | Contra-indication | 105<br>(0.02) | 107<br>(0.02) | 111<br>(0.02) | 121<br>(0.02) | 121<br>(0.02) | 117<br>(0.03) | 682<br>(0.02) |
| 42312     | 14LX.00   | H/O: dipyridamole allergy                                    | Yes        | Contra-indication | 37<br>(0.01)  | 62<br>(0.01)  | 99<br>(0.02)  | 125<br>(0.03) | 124<br>(0.03) | 129<br>(0.03) | 576<br>(0.02) |
| 14000     | 56F1.00   | Echocardiogram declined                                      | Yes        | Informed dissent  | 84<br>(0.02)  | 85<br>(0.02)  | 90<br>(0.02)  | 95<br>(0.02)  | 100<br>(0.02) | 106<br>(0.02) | 560<br>(0.02) |
| 47141     | U60C413   | [X] Adverse reaction to ramipril                             | Yes        | Contra-indication | 65<br>(0.01)  | 72<br>(0.01)  | 85<br>(0.02)  | 101<br>(0.02) | 112<br>(0.02) | 116<br>(0.03) | 551<br>(0.02) |
| 30752     | U604200   | [X]Anticoagulant causing adverse effects in therapeutic use  | Yes        | Contra-indication | 74<br>(0.02)  | 88<br>(0.02)  | 103<br>(0.02) | 103<br>(0.02) | 90<br>(0.02)  | 89<br>(0.02)  | 547<br>(0.02) |
| 48351     | U60B715   | [X] Adverse reaction to atenolol                             | Yes        | Contra-indication | 76<br>(0.02)  | 84<br>(0.02)  | 86<br>(0.02)  | 95<br>(0.02)  | 95<br>(0.02)  | 96<br>(0.02)  | 532<br>(0.02) |
| 64062     | 9hH1.00   | Excepted heart failure quality indicators: Informed dissent  | No         | Informed dissent  | 18<br>(0.00)  | 98<br>(0.02)  | 84<br>(0.02)  | 117<br>(0.02) | 104<br>(0.02) | 83<br>(0.02)  | 504<br>(0.02) |
| 30772     | ZV14F00   | [V]Personal history of influenza vaccine allergy             | Yes        | Contra-indication | 64<br>(0.01)  | 74<br>(0.01)  | 83<br>(0.02)  | 89<br>(0.02)  | 89<br>(0.02)  | 83<br>(0.02)  | 482<br>(0.02) |
| 48350     | TJC7700   | Adverse reaction to captopril                                | Yes        | Contra-indication | 47<br>(0.01)  | 61<br>(0.01)  | 88<br>(0.02)  | 93<br>(0.02)  | 90<br>(0.02)  | 83<br>(0.02)  | 462<br>(0.02) |
| 30522     | 9h82.00   | Excepted from cancer quality indicators: Informed dissent    | No         | Informed dissent  | 73<br>(0.01)  | 62<br>(0.01)  | 87<br>(0.02)  | 84<br>(0.02)  | 84<br>(0.02)  | 51<br>(0.01)  | 441<br>(0.01) |
| 45535     | 9h6..00   | Exception reporting: epilepsy quality indicators             | No         | Unknown           | 58<br>(0.01)  | 73<br>(0.01)  | 85<br>(0.02)  | 83<br>(0.02)  | 79<br>(0.02)  | 47<br>(0.01)  | 425<br>(0.01) |
| 58678     | 9hG..00   | Exception reporting: smoking quality indicators              | No         | Unknown           | 43<br>(0.01)  | 56<br>(0.01)  | 52<br>(0.01)  | 98<br>(0.02)  | 26<br>(0.01)  | 33<br>(0.01)  | 308<br>(0.01) |
| 42580     | U605111   | [X] Adverse reaction to salicylates                          | Yes        | Contra-indication | 41<br>(0.01)  | 51<br>(0.01)  | 51<br>(0.01)  | 53<br>(0.01)  | 50<br>(0.01)  | 50<br>(0.01)  | 296<br>(0.01) |
| 30638     | 8I3w.00   | Cholesterol test declined                                    | No         | Informed dissent  | 33<br>(0.01)  | 38<br>(0.01)  | 38<br>(0.01)  | 62<br>(0.01)  | 51<br>(0.01)  | 59<br>(0.01)  | 281<br>(0.01) |
| 46541     | U60B71C   | [X] Adverse reaction to betablockers NOS                     | Yes        | Contra-indication | 40<br>(0.01)  | 41<br>(0.01)  | 44<br>(0.01)  | 48<br>(0.01)  | 52<br>(0.01)  | 48<br>(0.01)  | 273<br>(0.01) |

| CPRD code | Read code | Description                                                 | Persistent | Type*             | 2006/7        | 2007/8       | 2008/9       | 2009/10      | 2010/11      | 2011/12      | Total         |
|-----------|-----------|-------------------------------------------------------------|------------|-------------------|---------------|--------------|--------------|--------------|--------------|--------------|---------------|
| 28649     | 9h12.00   | Excepted from LVD quality indicators: Informed dissent      | No         | Informed dissent  | 147<br>(0.03) | 37<br>(0.01) | 25<br>(0.01) | 10<br>(0.00) | 5<br>(0.00)  | 20<br>(0.00) | 244<br>(0.01) |
| 30714     | 56F0.00   | CT scan brain declined                                      | Yes        | Informed dissent  | 42<br>(0.01)  | 37<br>(0.01) | 35<br>(0.01) | 38<br>(0.01) | 42<br>(0.01) | 34<br>(0.01) | 228<br>(0.01) |
| 46076     | TJC6400   | Adverse reaction to metoprolol                              | Yes        | Contra-indication | 32<br>(0.01)  | 35<br>(0.01) | 37<br>(0.01) | 39<br>(0.01) | 41<br>(0.01) | 39<br>(0.01) | 223<br>(0.01) |
| 34469     | ZV14E00   | [V]PH of angiotensin II receptor antagonist allergy         | Yes        | Contra-indication | 35<br>(0.01)  | 38<br>(0.01) | 36<br>(0.01) | 33<br>(0.01) | 33<br>(0.01) | 37<br>(0.01) | 212<br>(0.01) |
| 28681     | 9h7..00   | Exception reporting: thyroid quality indicators             | No         | Unknown           | 16<br>(0.00)  | 24<br>(0.00) | 50<br>(0.01) | 30<br>(0.01) | 45<br>(0.01) | 40<br>(0.01) | 205<br>(0.01) |
| 39564     | TJC6700   | Adverse reaction to sotalol                                 | Yes        | Contra-indication | 30<br>(0.01)  | 28<br>(0.01) | 32<br>(0.01) | 33<br>(0.01) | 39<br>(0.01) | 40<br>(0.01) | 202<br>(0.01) |
| 45023     | U60C412   | [X] Adverse reaction to enalapril                           | Yes        | Contra-indication | 21<br>(0.00)  | 23<br>(0.00) | 25<br>(0.01) | 29<br>(0.01) | 31<br>(0.01) | 27<br>(0.01) | 156<br>(0.01) |
| 34213     | 9h1..00   | Exception reporting: LVD quality indicators                 | No         | Unknown           | 55<br>(0.01)  | 69<br>(0.01) | 13<br>(0.00) | 12<br>(0.00) | 4<br>(0.00)  | 1<br>(0.00)  | 154<br>(0.01) |
| 90935     | 9hH..00   | Exception reporting: heart failure quality indicators       | No         | Unknown           | 6<br>(0.00)   | 49<br>(0.01) | 25<br>(0.01) | 33<br>(0.01) | 12<br>(0.00) | 6<br>(0.00)  | 131<br>(0.00) |
| 63350     | 9hF..00   | Exception reporting: atrial fibrillation quality indicators | No         | Unknown           | 38<br>(0.01)  | 40<br>(0.01) | 19<br>(0.00) | 12<br>(0.00) | 12<br>(0.00) | 2<br>(0.00)  | 123<br>(0.00) |
| 68285     | U60C314   | [X] Adverse reaction to isosorbide mononitrate              | Yes        | Contra-indication | 14<br>(0.00)  | 13<br>(0.00) | 15<br>(0.00) | 18<br>(0.00) | 20<br>(0.00) | 17<br>(0.00) | 97<br>(0.00)  |
| 41412     | U60B712   | [X] Adverse reaction to propranolol                         | Yes        | Contra-indication | 10<br>(0.00)  | 11<br>(0.00) | 16<br>(0.00) | 17<br>(0.00) | 21<br>(0.00) | 21<br>(0.00) | 96<br>(0.00)  |
| 47554     | ZV14C00   | [V]Personal history of betablocker allergy                  | Yes        | Contra-indication | 13<br>(0.00)  | 17<br>(0.00) | 20<br>(0.00) | 15<br>(0.00) | 14<br>(0.00) | 15<br>(0.00) | 94<br>(0.00)  |
| 30713     | 5695.00   | Magnetic resonance imaging scan declined                    | Yes        | Informed dissent  | 14<br>(0.00)  | 13<br>(0.00) | 11<br>(0.00) | 14<br>(0.00) | 17<br>(0.00) | 14<br>(0.00) | 83<br>(0.00)  |
| 55949     | U60C316   | [X] Adverse reaction to dipyridamole                        | Yes        | Contra-indication | 5<br>(0.00)   | 7<br>(0.00)  | 9<br>(0.00)  | 17<br>(0.00) | 20<br>(0.00) | 19<br>(0.00) | 77<br>(0.00)  |
| 44341     | 9hD..00   | Exception reporting: dementia quality indicators            | No         | Unknown           | 8<br>(0.00)   | 12<br>(0.00) | 3<br>(0.00)  | 6<br>(0.00)  | 28<br>(0.01) | 6<br>(0.00)  | 63<br>(0.00)  |
| 36674     | TJ42000   | Adverse reaction to heparin                                 | Yes        | Contra-indication | 7<br>(0.00)   | 8<br>(0.00)  | 10<br>(0.00) | 12<br>(0.00) | 15<br>(0.00) | 10<br>(0.00) | 62<br>(0.00)  |
| 70388     | TJ42300   | Adverse reaction to phenindione                             | Yes        | Contra-indication | 6<br>(0.00)   | 9<br>(0.00)  | 9<br>(0.00)  | 10<br>(0.00) | 10<br>(0.00) | 11<br>(0.00) | 55<br>(0.00)  |
| 52662     | TJC6800   | Adverse reaction to timolol                                 | Yes        | Contra-indication | 7<br>(0.00)   | 6<br>(0.00)  | 7<br>(0.00)  | 7<br>(0.00)  | 9<br>(0.00)  | 11<br>(0.00) | 47<br>(0.00)  |

| CPRD code | Read code | Description                                    | Persistent | Type*             | 2006/7      | 2007/8      | 2008/9      | 2009/10     | 2010/11      | 2011/12      | Total        |
|-----------|-----------|------------------------------------------------|------------|-------------------|-------------|-------------|-------------|-------------|--------------|--------------|--------------|
| 35480     | TJ42z00   | Adverse reaction to anticoagulants NOS         | Yes        | Contra-indication | 4<br>(0.00) | 5<br>(0.00) | 6<br>(0.00) | 6<br>(0.00) | 12<br>(0.00) | 10<br>(0.00) | 43<br>(0.00) |
| 39450     | U604213   | [X] Adverse reaction to warfarin sodium        | Yes        | Contra-indication | 7<br>(0.00) | 6<br>(0.00) | 8<br>(0.00) | 7<br>(0.00) | 6<br>(0.00)  | 4<br>(0.00)  | 38<br>(0.00) |
| 47857     | U604211   | [X] Adverse reaction to anticoagulants         | Yes        | Contra-indication | 5<br>(0.00) | 5<br>(0.00) | 7<br>(0.00) | 6<br>(0.00) | 4<br>(0.00)  | 3<br>(0.00)  | 30<br>(0.00) |
| 60147     | ZV14B00   | [V]Personal history of clopidogrel allergy     | Yes        | Contra-indication | 2<br>(0.00) | 4<br>(0.00) | 6<br>(0.00) | 6<br>(0.00) | 5<br>(0.00)  | 5<br>(0.00)  | 28<br>(0.00) |
| 12334     | 9h8..00   | Exception reporting: cancer quality indicators | No         | Unknown           | 8<br>(0.00) | 6<br>(0.00) | 5<br>(0.00) | 4<br>(0.00) | 1<br>(0.00)  | 2<br>(0.00)  | 26<br>(0.00) |
| 43499     | TJC6100   | Adverse reaction to acebutolol                 | Yes        | Contra-indication | 4<br>(0.00) | 5<br>(0.00) | 5<br>(0.00) | 4<br>(0.00) | 3<br>(0.00)  | 3<br>(0.00)  | 24<br>(0.00) |
| 73878     | U60B717   | [X] Adverse reaction to metoprolol             | Yes        | Contra-indication | 2<br>(0.00) | 4<br>(0.00) | 4<br>(0.00) | 5<br>(0.00) | 4<br>(0.00)  | 4<br>(0.00)  | 23<br>(0.00) |
| 14001     | 5534.00   | Angiocardiology declined                       | Yes        | Informed dissent  | 2<br>(0.00) | 4<br>(0.00) | 4<br>(0.00) | 4<br>(0.00) | 3<br>(0.00)  | 2<br>(0.00)  | 19<br>(0.00) |
| 68465     | U60C411   | [X] Adverse reaction to captopril              | Yes        | Contra-indication | 5<br>(0.00) | 4<br>(0.00) | 2<br>(0.00) | 3<br>(0.00) | 1<br>(0.00)  | 1<br>(0.00)  | 16<br>(0.00) |
| 49679     | U60B71A   | [X] Adverse reaction to sotalol                | Yes        | Contra-indication | 2<br>(0.00) | 2<br>(0.00) | 3<br>(0.00) | 3<br>(0.00) | 3<br>(0.00)  | 3<br>(0.00)  | 16<br>(0.00) |
| 96808     | U604216   | [X] Adverse reaction to anticoagulants NOS     | Yes        | Contra-indication | 2<br>(0.00) | 2<br>(0.00) | 2<br>(0.00) | 2<br>(0.00) | 2<br>(0.00)  | 2<br>(0.00)  | 12<br>(0.00) |
| 61025     | ZV14A00   | [V]Personal history of warfarin allergy        | Yes        | Contra-indication | 3<br>(0.00) | 3<br>(0.00) | 2<br>(0.00) | 1<br>(0.00) | 1<br>(0.00)  | 2<br>(0.00)  | 12<br>(0.00) |
| 92414     | TJ42200   | Adverse reaction to nicoumalone                | Yes        | Contra-indication | 1<br>(0.00) | 2<br>(0.00) | 2<br>(0.00) | 2<br>(0.00) | 2<br>(0.00)  | 2<br>(0.00)  | 11<br>(0.00) |
| 73787     | U60C312   | [X] Adverse reaction to glyceryl trinitrate    | Yes        | Contra-indication | 2<br>(0.00) | 2<br>(0.00) | 2<br>(0.00) | 1<br>(0.00) | 2<br>(0.00)  | 2<br>(0.00)  | 11<br>(0.00) |
| 61975     | TJC6500   | Adverse reaction to nadolol                    | Yes        | Contra-indication | 2<br>(0.00) | 2<br>(0.00) | 2<br>(0.00) | 2<br>(0.00) | 2<br>(0.00)  | 1<br>(0.00)  | 11<br>(0.00) |
| 96532     | U60C311   | [X] Adverse reaction to coronary vasodilator   | Yes        | Contra-indication | 1<br>(0.00) | 1<br>(0.00) | 1<br>(0.00) | 1<br>(0.00) | 2<br>(0.00)  | 3<br>(0.00)  | 9<br>(0.00)  |
| 49682     | U604212   | [X] Adverse reaction to heparin                | Yes        | Contra-indication | 1<br>(0.00) | 1<br>(0.00) | 1<br>(0.00) | 1<br>(0.00) | 1<br>(0.00)  | 1<br>(0.00)  | 6<br>(0.00)  |
| 57521     | TJC6300   | Adverse reaction to labetalol                  | Yes        | Contra-indication | 0<br>(0.00) | 1<br>(0.00) | 1<br>(0.00) | 1<br>(0.00) | 1<br>(0.00)  | 1<br>(0.00)  | 5<br>(0.00)  |
| 94109     | TJC6600   | Adverse reaction to oxprenolol                 | Yes        | Contra-indication | 1<br>(0.00) | 1<br>(0.00) | 0<br>(0.00) | 1<br>(0.00) | 1<br>(0.00)  | 1<br>(0.00)  | 5<br>(0.00)  |

| CPRD code | Read code | Description                                       | Persistent | Type*             | 2006/7      | 2007/8      | 2008/9      | 2009/10     | 2010/11     | 2011/12     | Total       |
|-----------|-----------|---------------------------------------------------|------------|-------------------|-------------|-------------|-------------|-------------|-------------|-------------|-------------|
| 65814     | U60B716   | [X] Adverse reaction to labetalol                 | Yes        | Contra-indication | 2<br>(0.00) | 1<br>(0.00) | 1<br>(0.00) | 0<br>(0.00) | 0<br>(0.00) | 1<br>(0.00) | 5<br>(0.00) |
| 96151     | U60C313   | [X] Adverse reaction to isosorbide dinitrate      | Yes        | Contra-indication | 0<br>(0.00) | 0<br>(0.00) | 1<br>(0.00) | 1<br>(0.00) | 1<br>(0.00) | 2<br>(0.00) | 5<br>(0.00) |
| 70518     | U60C318   | [X] Adverse reaction to coronary vasodilators NOS | Yes        | Contra-indication | 0<br>(0.00) | 0<br>(0.00) | 1<br>(0.00) | 1<br>(0.00) | 1<br>(0.00) | 1<br>(0.00) | 4<br>(0.00) |
| 96531     | U60B714   | [X] Adverse reaction to acebutolol                | Yes        | Contra-indication | 1<br>(0.00) | 1<br>(0.00) | 1<br>(0.00) | 0<br>(0.00) | 0<br>(0.00) | 0<br>(0.00) | 3<br>(0.00) |

\* Types include: informed dissent (refusal), contraindication (unsuitability) and unknown reason (generic code).



**Table A5: Predictors of exception reporting (at least one exception code within each year and patient); logistic regression analyses on ONS linked data from 357 practices.**

|                                         | Odds Ratios (99% Confidence interval) |                            |                  |
|-----------------------------------------|---------------------------------------|----------------------------|------------------|
|                                         | All reasons*†                         | Clinical contraindication‡ | Informed dissent |
| <i>QOF year</i>                         |                                       |                            |                  |
| 2006/7                                  | Reference                             | Reference                  | Reference        |
| 2007/8                                  | 1.01(0.9999,1.03)                     | 0.92(0.90,0.94)            | 1.13(1.11,1.15)  |
| 2008/9                                  | 0.96(0.95,0.98)                       | 0.90(0.88,0.91)            | 1.06(1.04,1.08)  |
| 2009/10                                 | 1.06(1.04,1.07)                       | 0.996(0.98,1.02)           | 1.16(1.14,1.18)  |
| 2010/11                                 | 1.24(1.22,1.26)                       | 1.12(1.09,1.14)            | 1.40(1.37,1.42)  |
| 2011/12                                 | 1.20(1.18,1.22)                       | 1.12(1.10,1.14)            | 1.29(1.27,1.32)  |
| List size (1000s)                       | 1.01(1.01,1.01)                       | 0.99(0.99,0.997)           | 1.02(1.02,1.02)  |
| <i>English region</i>                   |                                       |                            |                  |
| North East                              | Reference                             | Reference                  | Reference        |
| North West                              | 1.09(1.02,1.16)                       | 1.66(1.52,1.81)            | 0.75(0.70,0.80)  |
| Yorkshire & The Humber                  | 0.69(0.64,0.75)                       | 1.01(0.91,1.11)            | 0.58(0.54,0.63)  |
| East Midlands                           | 1.15(1.06,1.25)                       | 1.60(1.43,1.78)            | 0.93(0.86,1.01)  |
| West Midlands                           | 0.67(0.63,0.72)                       | 1.02(0.94,1.12)            | 0.49(0.46,0.53)  |
| East of England                         | 1.09(1.02,1.17)                       | 1.89(1.72,2.07)            | 0.65(0.61,0.70)  |
| South West                              | 1.11(1.04,1.19)                       | 1.84(1.68,2.01)            | 0.70(0.65,0.75)  |
| South Central                           | 0.87(0.81,0.93)                       | 1.23(1.13,1.35)            | 0.67(0.62,0.72)  |
| London                                  | 0.70(0.66,0.75)                       | 0.94(0.86,1.03)            | 0.61(0.57,0.65)  |
| South East Coast                        | 0.70(0.66,0.75)                       | 0.93(0.85,1.02)            | 0.63(0.58,0.67)  |
| <i>Practice deprivation quintile</i>    |                                       |                            |                  |
| 1 (least deprived)                      | Reference                             | Reference                  | Reference        |
| 2                                       | 1.29(1.25,1.33)                       | 1.60(1.53,1.67)            | 1.01(0.97,1.04)  |
| 3                                       | 1.51(1.46,1.57)                       | 1.77(1.70,1.85)            | 1.15(1.11,1.20)  |
| 4                                       | 1.27(1.23,1.31)                       | 1.49(1.43,1.57)            | 1.02(0.98,1.06)  |
| 5                                       | 1.34(1.29,1.39)                       | 1.41(1.35,1.48)            | 1.19(1.14,1.24)  |
| <i>Gender</i>                           |                                       |                            |                  |
| Female                                  | Reference                             | Reference                  | Reference        |
| Male                                    | 1.59(1.56,1.62)                       | 1.40(1.37,1.44)            | 1.53(1.49,1.56)  |
| Age                                     | 1.02(1.02,1.02)                       | 1.04(1.04,1.04)            | 1.01(1.005,1.01) |
| <i>Patient deprivation quintile</i>     |                                       |                            |                  |
| 1 (least deprived)                      | Reference                             | Reference                  | Reference        |
| 2                                       | 1.07(1.04,1.10)                       | 1.14(1.10,1.18)            | 1.00(0.97,1.03)  |
| 3                                       | 1.12(1.08,1.15)                       | 1.14(1.10,1.19)            | 1.09(1.06,1.13)  |
| 4                                       | 1.18(1.15,1.22)                       | 1.22(1.17,1.27)            | 1.15(1.11,1.19)  |
| 5                                       | 1.22(1.17,1.26)                       | 1.44(1.38,1.51)            | 1.07(1.03,1.11)  |
| <i>Number of conditions<sup>¶</sup></i> |                                       |                            |                  |
| One                                     | Reference                             | Reference                  | Reference        |
| Two                                     | 3.82(3.75,3.88)                       | 4.28(4.18,4.38)            | 2.68(2.63,2.74)  |
| Three                                   | 10.43(10.18,10.69)                    | 16.32(15.82,16.83)         | 4.02(3.91,4.13)  |
| Four or more                            | 30.34(29.43,31.28)                    | 68.69(66.12,71.37)         | 5.17(5.00,5.35)  |

\* Clinical contraindication, informed dissent or reason unknown. Logistical exceptions were not included in analyses.

† No. of observations=5787456, No of subjects=1414897, Log likelihood=-1906771, Wald Chi<sup>2</sup>=177557.

‡ No. of observations=5787456, No of subjects=1414897, Log likelihood=-1233953, Wald Chi<sup>2</sup>=155098.

§ No. of observations=5787456, No of subjects=1414897, Log likelihood=-1278646, Wald Chi<sup>2</sup>=44177.

¶ From the 16 conditions included in the analyses: atrial fibrillation, asthma, hypertension, cancer, coronary heart disease, heart failure, chronic kidney disease, chronic obstructive pulmonary disease, dementia, depression, diabetes mellitus, epilepsy, learning disability, severe mental illness, stroke and hypothyroidism.

Table A6: Exception reporting (all reasons\*) as a predictor of survival in the subsequent year; proportional-hazards survival analyses on ONS linked data from 357 practices.

|                                       | Hazard Ratios (99% Confidence Interval) |                         |
|---------------------------------------|-----------------------------------------|-------------------------|
|                                       | CPRD deaths <sup>†</sup>                | ONS deaths <sup>‡</sup> |
| <i>Exception reported<sup>§</sup></i> |                                         |                         |
| All reasons                           | 1.38(1.35,1.41)                         | 1.38(1.35,1.41)         |
| Age <sup>¶</sup>                      | 1.07(1.05,1.09)                         | 1.07(1.05,1.09)         |
| <i>Gender</i>                         |                                         |                         |
| Female                                | Reference                               | Reference               |
| Male                                  | 1.29(1.26,1.31)                         | 1.28(1.25,1.30)         |
| <i>Smoking status</i>                 |                                         |                         |
| Never smoked                          | Reference                               | Reference               |
| Ex-smoker                             | 0.96(0.94,0.98)                         | 0.97(0.95,0.996)        |
| Current smoker                        | 1.58(1.53,1.64)                         | 1.60(1.55,1.66)         |
| Missing <sup>¶</sup>                  | 6.19(0.95,40.30)                        | 8.45(1.19,59.85)        |
| <i>Patient deprivation quintile</i>   |                                         |                         |
| 1 (least deprived)                    | Reference                               | Reference               |
| 2                                     | 1.07(1.04,1.10)                         | 1.06(1.03,1.09)         |
| 3                                     | 1.15(1.11,1.18)                         | 1.12(1.09,1.16)         |
| 4                                     | 1.22(1.18,1.26)                         | 1.20(1.16,1.24)         |
| 5                                     | 1.36(1.31,1.41)                         | 1.32(1.27,1.37)         |
| Practice list size (1000s)            | 1.001(0.9995,1.003)                     | 1.000(0.999,1.002)      |
| <i>Practice deprivation quintile</i>  |                                         |                         |
| 1 (least deprived)                    | Reference                               | Reference               |
| 2                                     | 1.01(0.97,1.04)                         | 0.99(0.96,1.03)         |
| 3                                     | 0.97(0.93,1.001)                        | 0.98(0.95,1.01)         |
| 4                                     | 0.96(0.93,0.997)                        | 0.99(0.95,1.02)         |
| 5                                     | 1.03(0.99,1.07)                         | 1.03(0.99,1.07)         |
| <i>Conditions</i>                     |                                         |                         |
| Atrial fibrillation                   | 1.33(1.30,1.37)                         | 1.33(1.29,1.36)         |
| Asthma                                | 0.92(0.89,0.95)                         | 0.92(0.89,0.95)         |
| Hypertension                          | 0.90(0.88,0.92)                         | 0.90(0.88,0.92)         |
| Cancer <sup>¶</sup>                   | 2.75(1.93,3.93)                         | 1.60(1.11,2.31)         |
| Coronary heart disease                | 0.98(0.96,1.01)                         | 0.98(0.96,1.005)        |
| Heart failure                         | 1.71(1.66,1.77)                         | 1.69(1.63,1.74)         |
| Chronic kidney disease <sup>¶</sup>   | 1.50(1.07,2.12)                         | 1.62(1.14,2.29)         |
| Chronic obstructive pulmonary disease | 1.76(1.70,1.81)                         | 1.73(1.68,1.79)         |
| Dementia <sup>¶</sup>                 | 3.52(2.12,5.86)                         | 3.14(1.89,5.22)         |
| Depression                            | 1.05(1.03,1.08)                         | 1.06(1.04,1.08)         |
| Diabetes mellitus <sup>¶</sup>        | 1.52(1.03,2.22)                         | 1.39(0.94,2.05)         |
| Epilepsy                              | 1.67(1.56,1.78)                         | 1.69(1.58,1.80)         |
| Learning disability <sup>¶</sup>      | 12.02(0.53,274.09)                      | 9.44(0.35,258.31)       |
| Severe mental illness                 | 1.46(1.38,1.54)                         | 1.43(1.35,1.51)         |
| Stroke                                | 1.33(1.29,1.36)                         | 1.32(1.29,1.36)         |
| Hypothyroidism                        | 0.99(0.96,1.02)                         | 0.99(0.96,1.02)         |

|                                 | Hazard Ratios (99% Confidence Interval) |                         |
|---------------------------------|-----------------------------------------|-------------------------|
|                                 | CPRD deaths <sup>†</sup>                | ONS deaths <sup>‡</sup> |
| <i>Time-varying (x log(_t))</i> |                                         |                         |
| Age                             | 1.01(0.998,1.01)                        | 1.01(0.999,1.01)        |
| Smoking status: missing         | 0.40(0.16,0.99)                         | 0.34(0.13,0.89)         |
| Cancer                          | 0.93(0.79,1.10)                         | 1.20(1.01,1.43)         |
| Chronic kidney disease          | 0.90(0.77,1.06)                         | 0.87(0.74,1.03)         |
| Dementia                        | 0.82(0.65,1.04)                         | 0.89(0.70,1.13)         |
| Diabetes mellitus               | 0.90(0.76,1.08)                         | 0.94(0.78,1.13)         |
| Learning disability             | 0.46(0.10,2.14)                         | 0.52(0.10,2.64)         |

\* Clinical contraindication, informed dissent or reason unknown. Logistical exceptions were not included in analyses.

† No. of observations / time at risk=4416374, No of subjects=1194389, No. of failures=68567, Log pseudolikelihood=-869257, Wald Chi<sup>2</sup>=119932.

‡ No. of observations / time at risk=4416374, No of subjects=1194389, No. of failures=68756, Log pseudolikelihood=-869508, Wald Chi<sup>2</sup>=121371.

§ At least one code.

¶ Interpretation of the hazard ratios for these covariates is not straightforward because of the inclusion of the time-varying components.

Figure A1: Exception reporting rates by reason, in the diabetes domain of the QOF and aggregated over time\*\*†‡

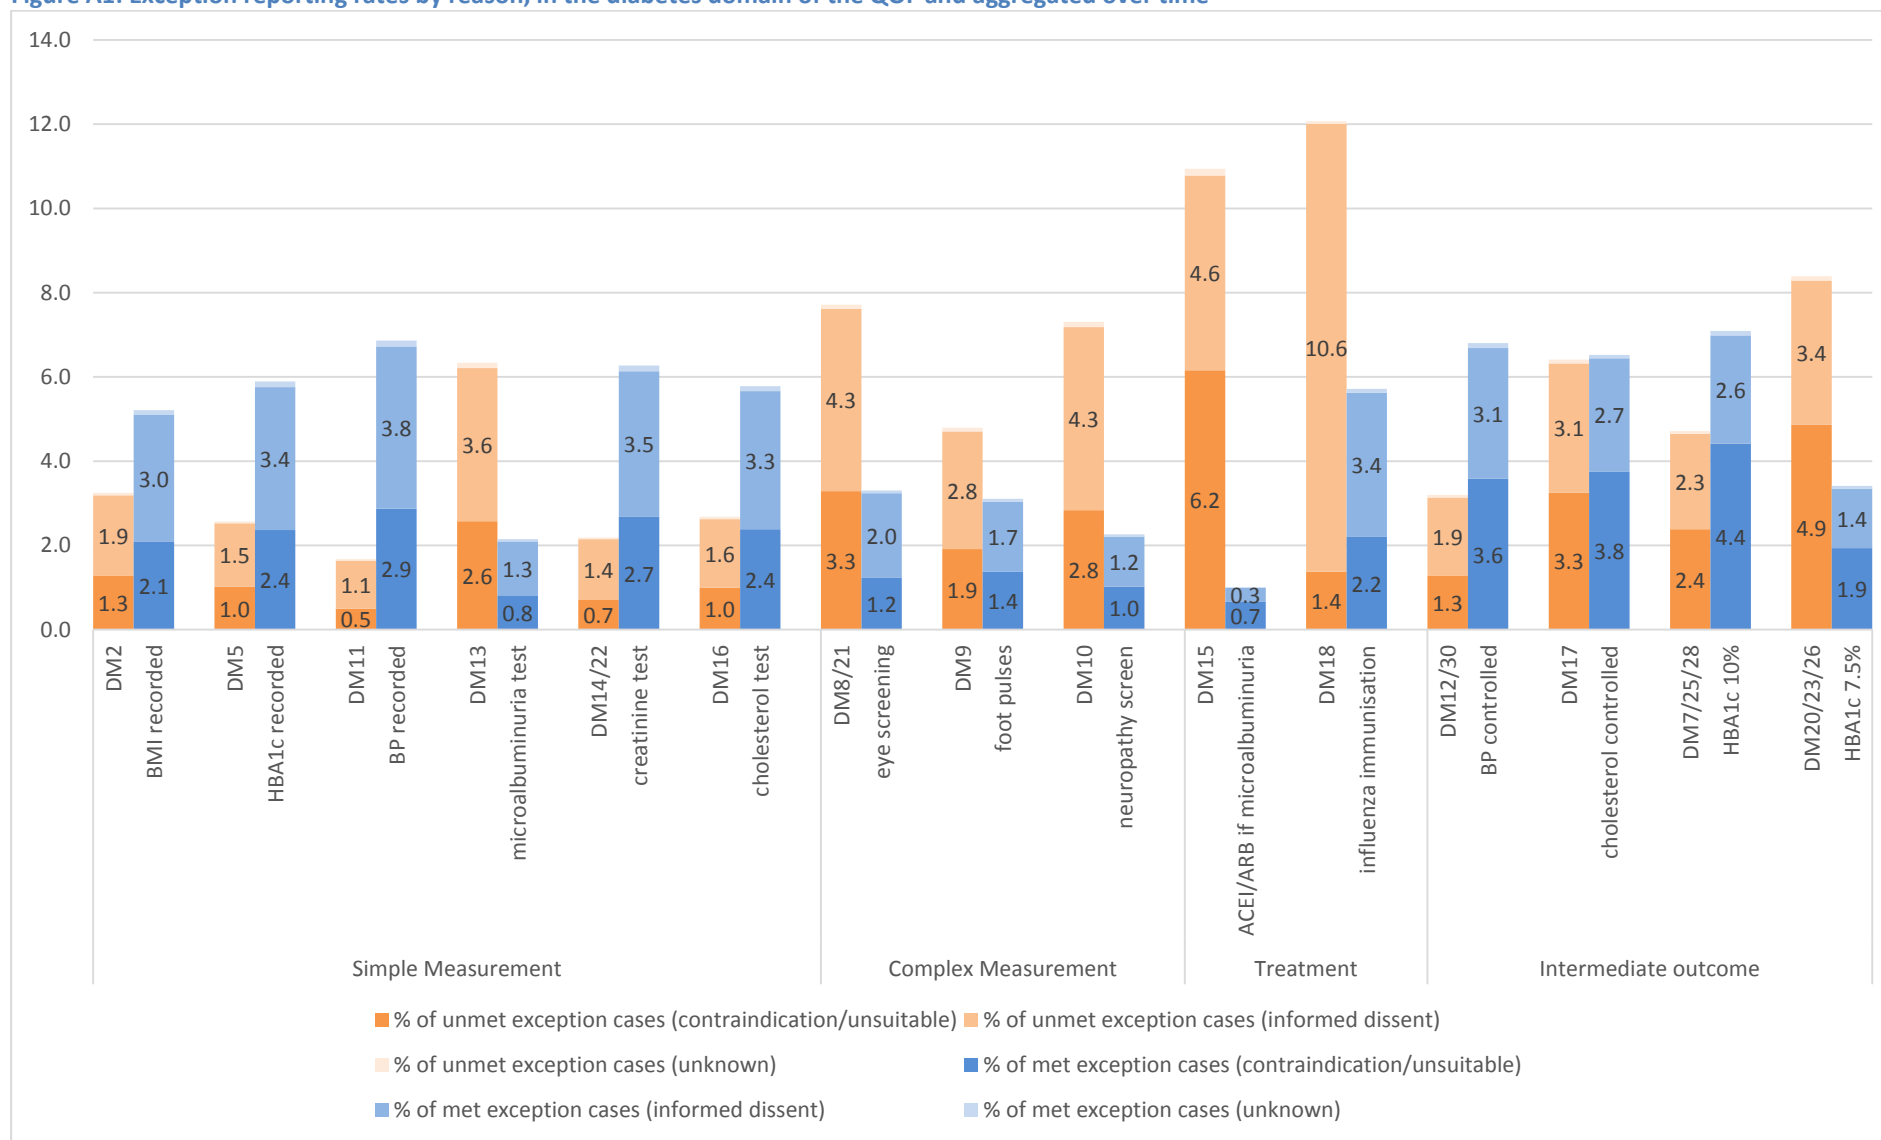

\* Details on the indicators are provided in appendix table A3

† DM9 changes significantly in 2011/12 so calculations for that indicator are limited to 2006/7-2010/11

‡ The reason for the first exception associated with a patient is reported
